# Supplementary material for: In-Depth Genomic and Transcriptomic Analysis of Five K+ Transporter Gene Families in Soybean Confirm Their Differential Expression for Nodulation
Source: Front Plant Sci. 2017 May 23;8:804. doi: 10.3389/fpls.2017.00804 (PMC5440519; doi:10.3389/fpls.2017.00804)
Supplement: Supplementary file 7 [file DataSheet1.pdf]

## *Supplementary Material*

**Title: In-depth genomic and transcriptomic dissection of five potassium (K<sup>+</sup>) transporter gene families in soybean confirm their differential expression for nodulation**

**Hafiz Mamoon Rehman<sup>1</sup>, Muhammad Amjad Nawaz<sup>1</sup>, Zahid Hussain Shah<sup>2</sup>, Sadia Khatoon,<sup>3</sup>  
Seung Hwan Yang<sup>1\*</sup>, Gyuhwa Chung<sup>1</sup>**

**\* Correspondence:**

Seung Hwan Yang

Tel, +82-10-3603-1260; Fax, +82-61-659-7309; Email: [ymichigan@chonnam.ac.kr](mailto:ymichigan@chonnam.ac.kr)

Gyuhwa Chung

Tel, +82-10-3603-1260; Fax, +82-61-659-7309; Email: chung@chonnam.ac.kr

## Supplementary Figure 1

**HAK/KT/KUP Family**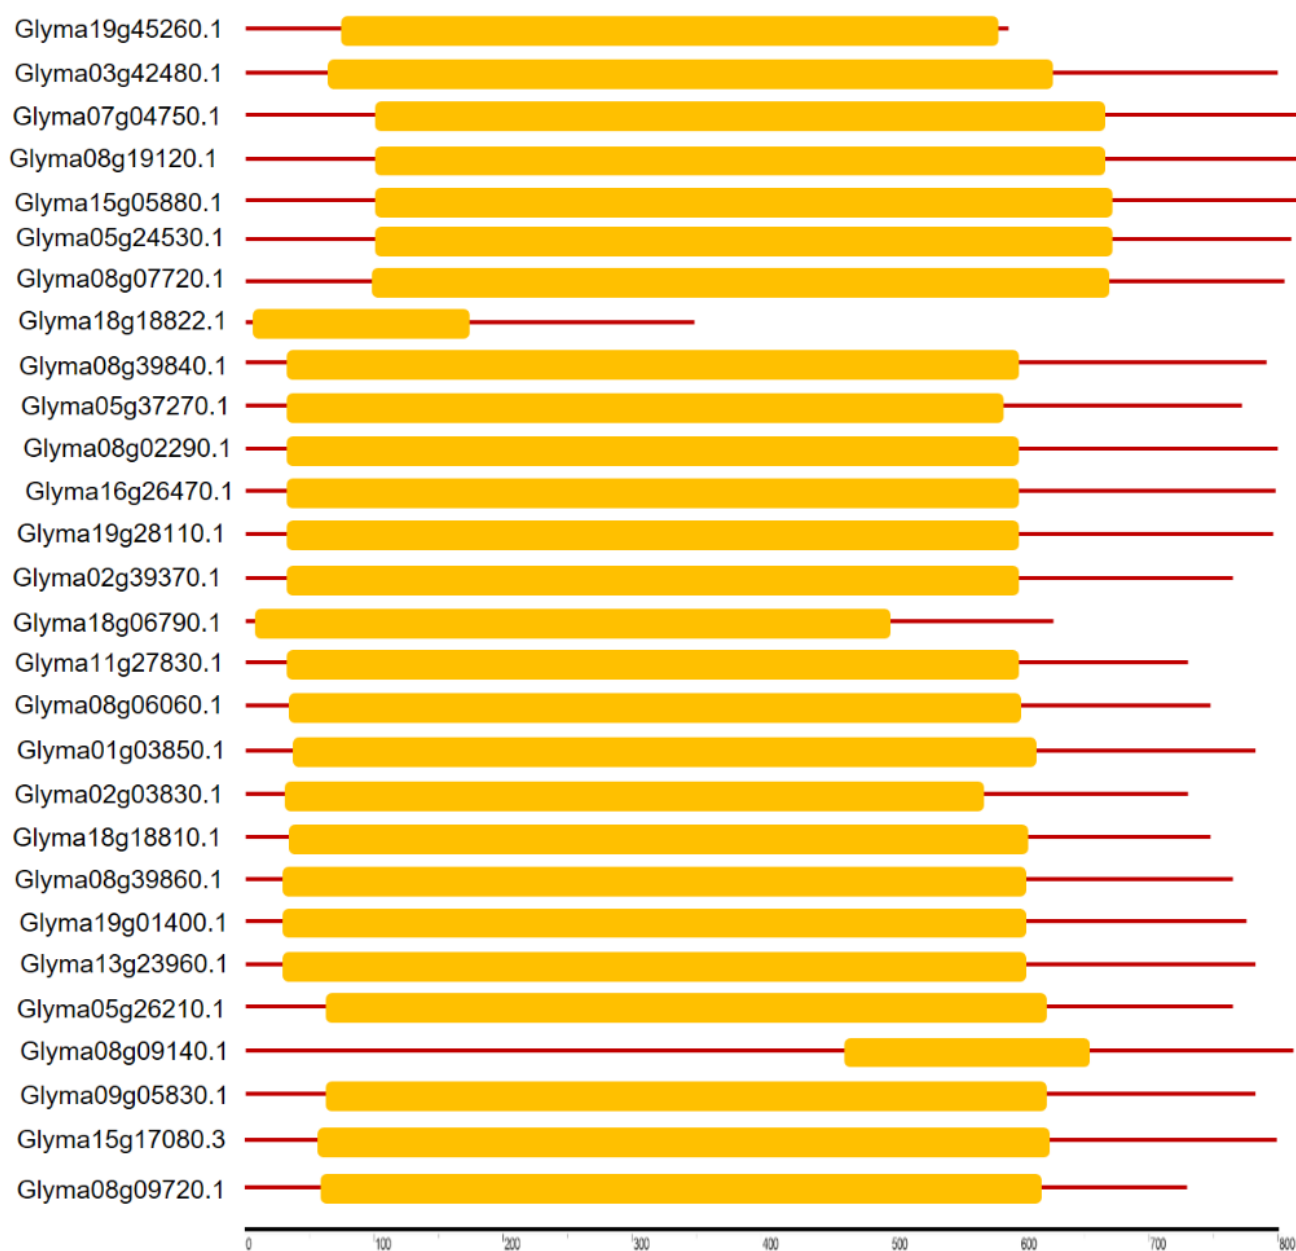

Continue...

Voltage gated K<sup>+</sup> channel family

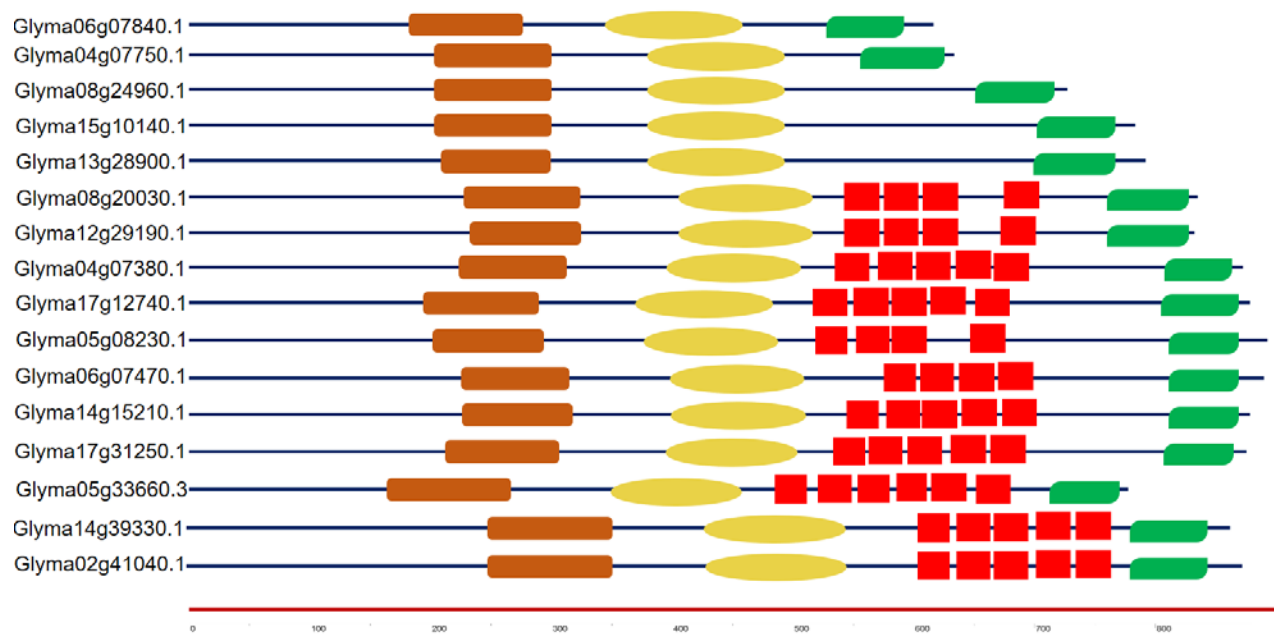

TPK/KCO family

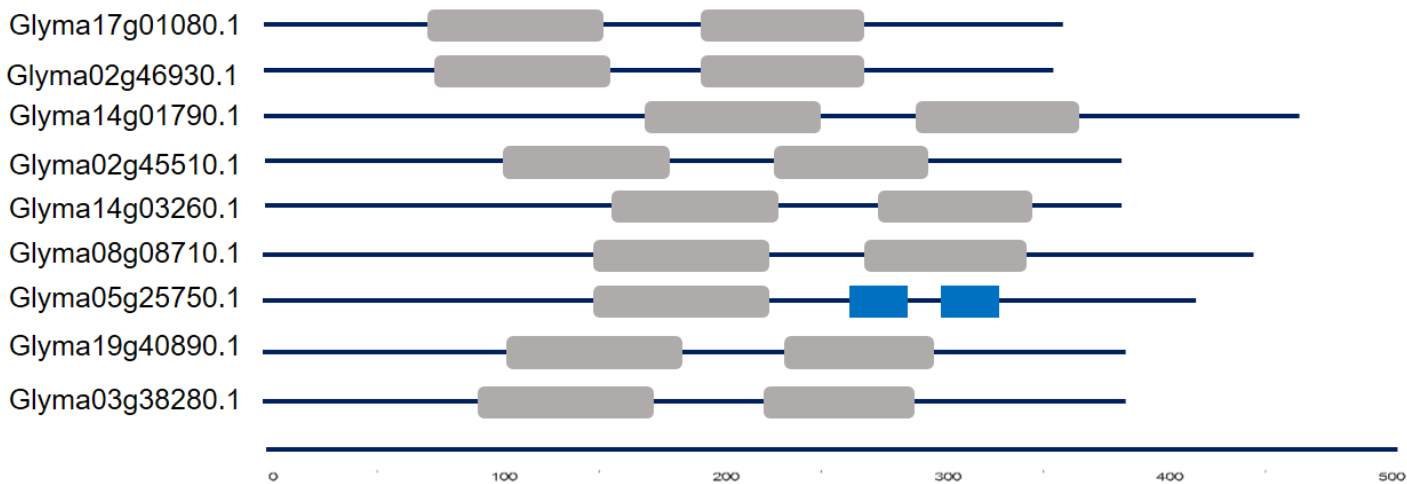

**HKT family**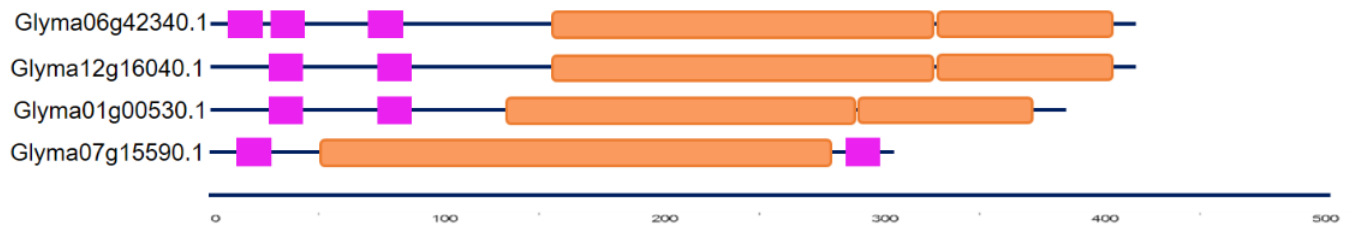

Continue...

**KEA family**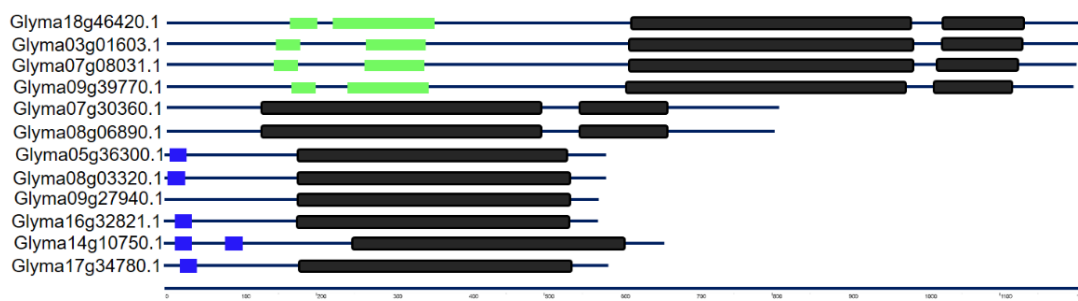**Figure legends**

- K<sup>+</sup> Transporter domain
- Ion transport protein
- Cyclic nucleotide-monophosphate binding domain
- KHA, dimerisation domain of potassium ion channel
- Ankyrin repeats
- Ion channel
- TM domain
- TM domain
- TrkH domain
- Coiled- coil domain
- Sodium/hydrogen exchanger domain
- TM domain

**Supplementary Figure 1.** Conserved domain organization in all 70 putative K<sup>+</sup> transporter genes from soybean. **HAK/KT/KUP** genes possess a K<sup>+</sup> transporter domain (yellow). The **Voltage-gated channel** family comprises four domains: ion transport protein (dark brown), cyclic nucleotide monophosphate binding domain (light yellow), KHA domain (green), and ankyrin repeats (red). Two ion channels were found in **TPK/KCO** family genes (grey). The **HKT** family has two TrkH and TMD domains (brown

and pink). **KEA** family genes have three coiled-coil domains (light green), a Na<sup>+</sup>/H<sup>+</sup> exchanger domain (black), and a TM domain (dark blue).

Supplementary Figure 2

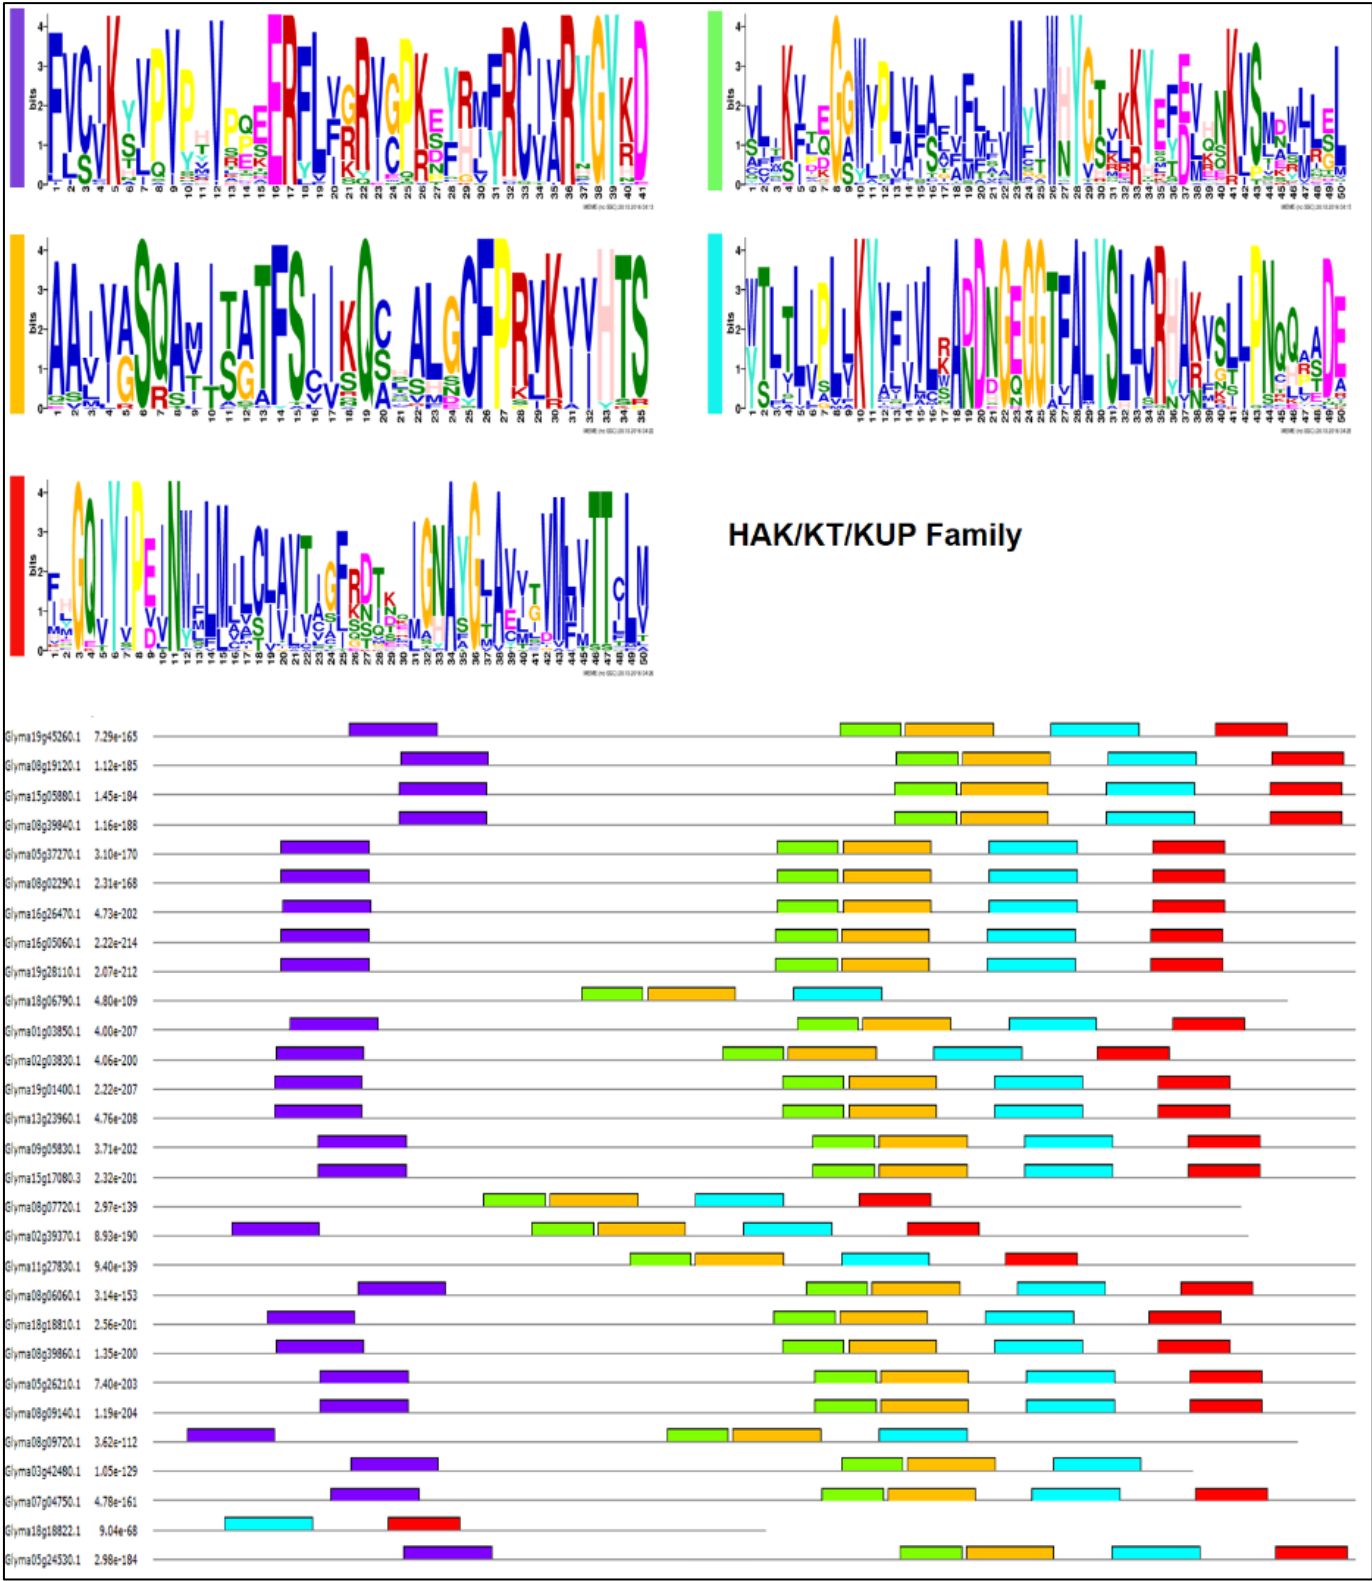

Continue...

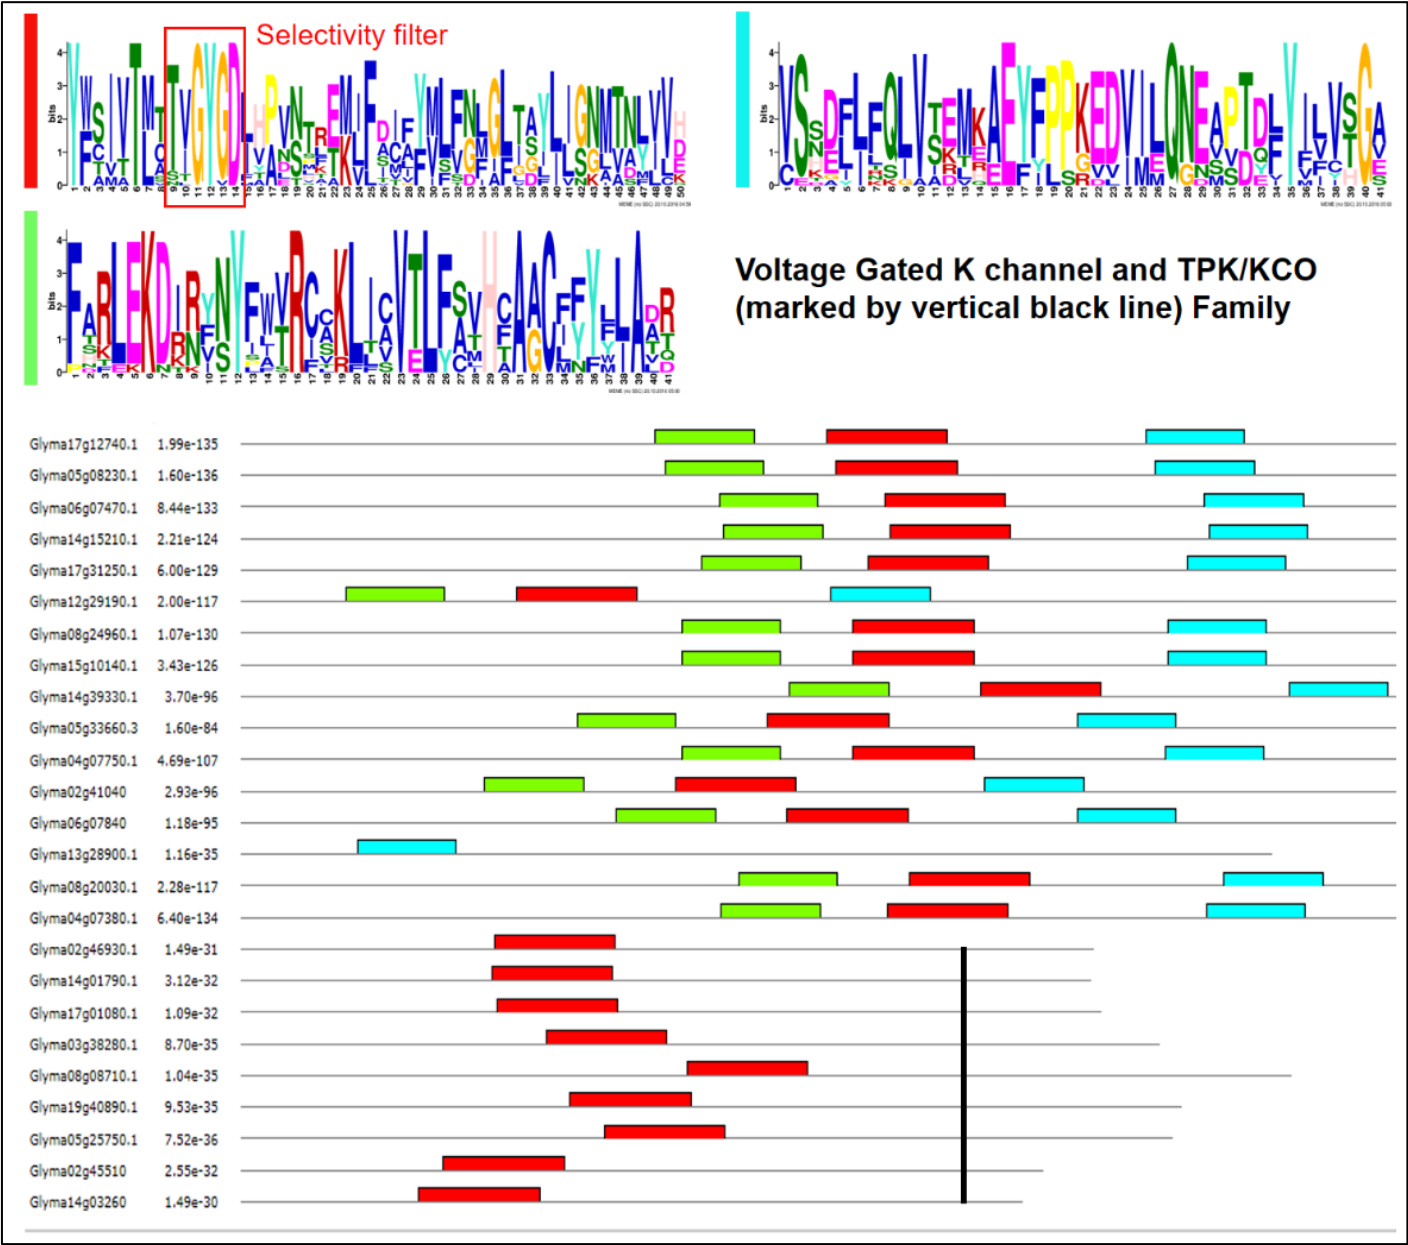

Continue...

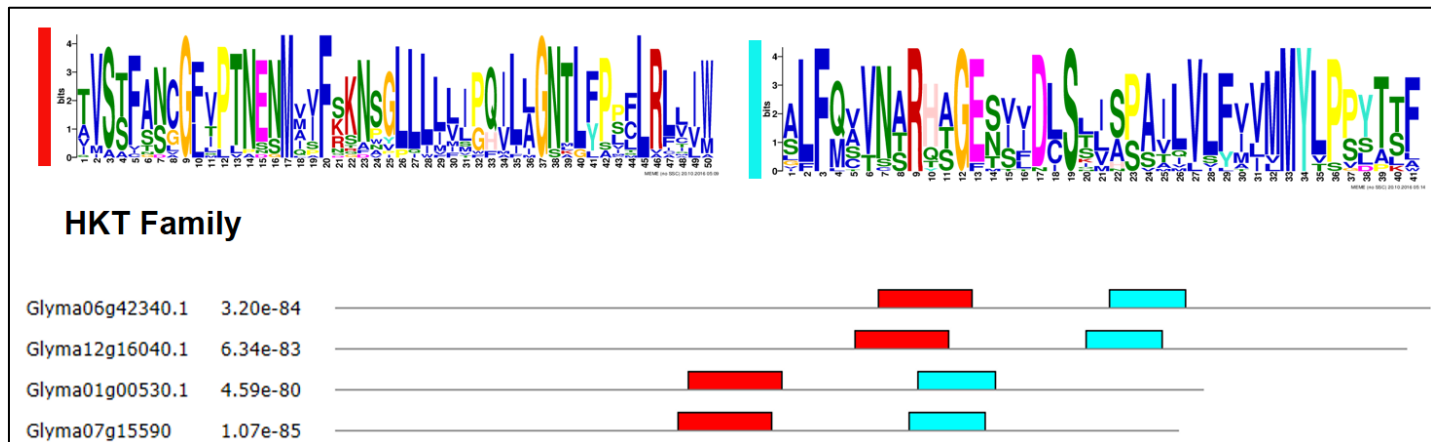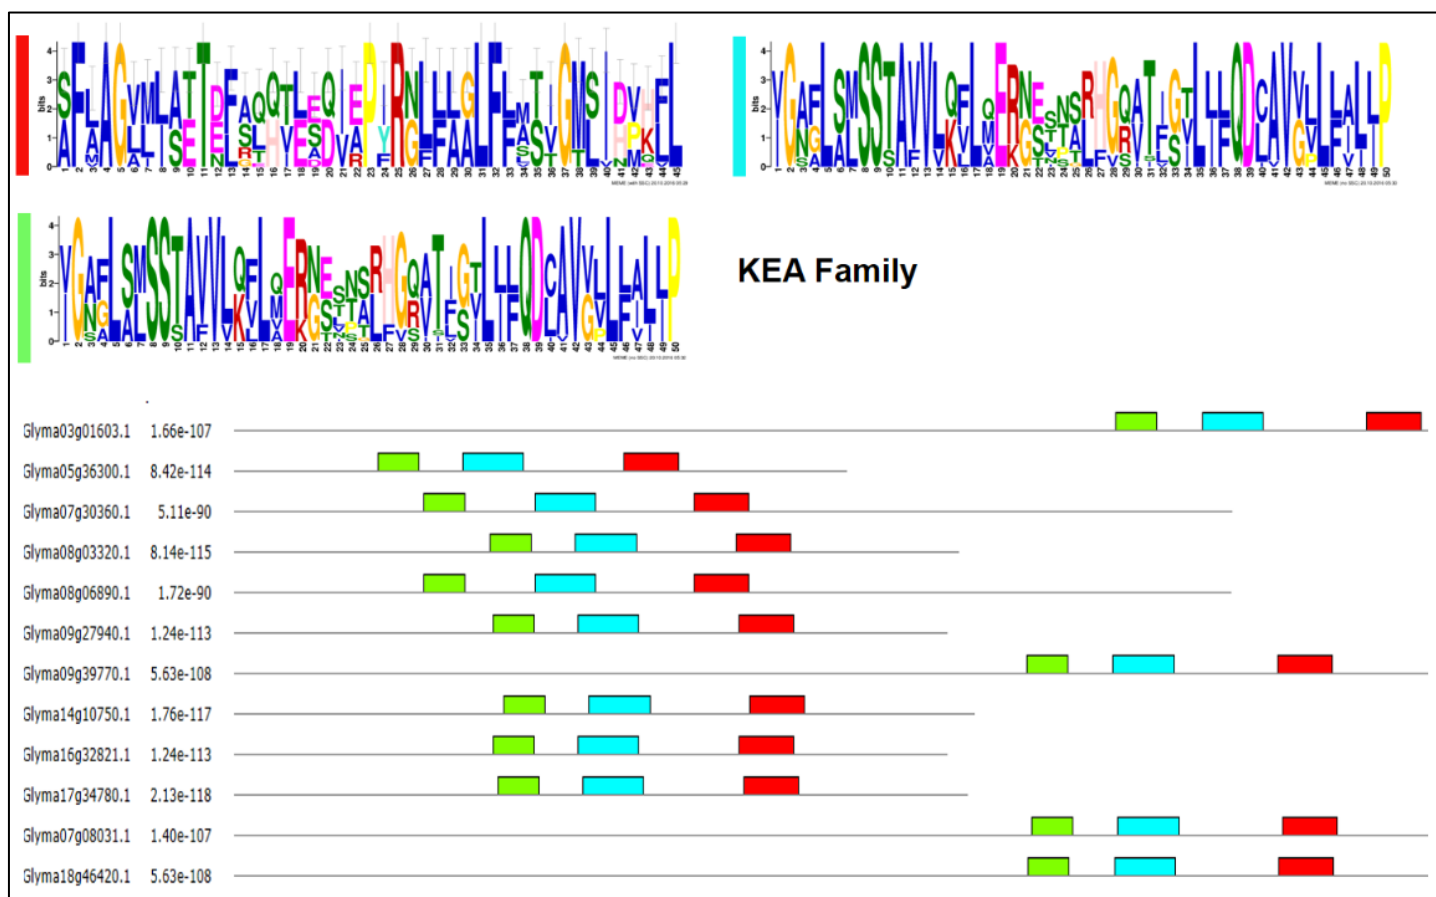

**Supplementary Figure 2.** Conserved motifs across all 70 putative  $K^+$  transporters genes. **HAK/KT/KUP** family is showing the five highly conserved motifs in their peptide sequences. Voltage-gated and **TPK/KCO** channel family genes have three motifs in which a red color motif having selectivity filter is shown across all the channel proteins. Two and three common motifs are shown for **HKT** and **KEA** family peptides.

## Supplementary Figure 3

## HAK/KT/KUP family

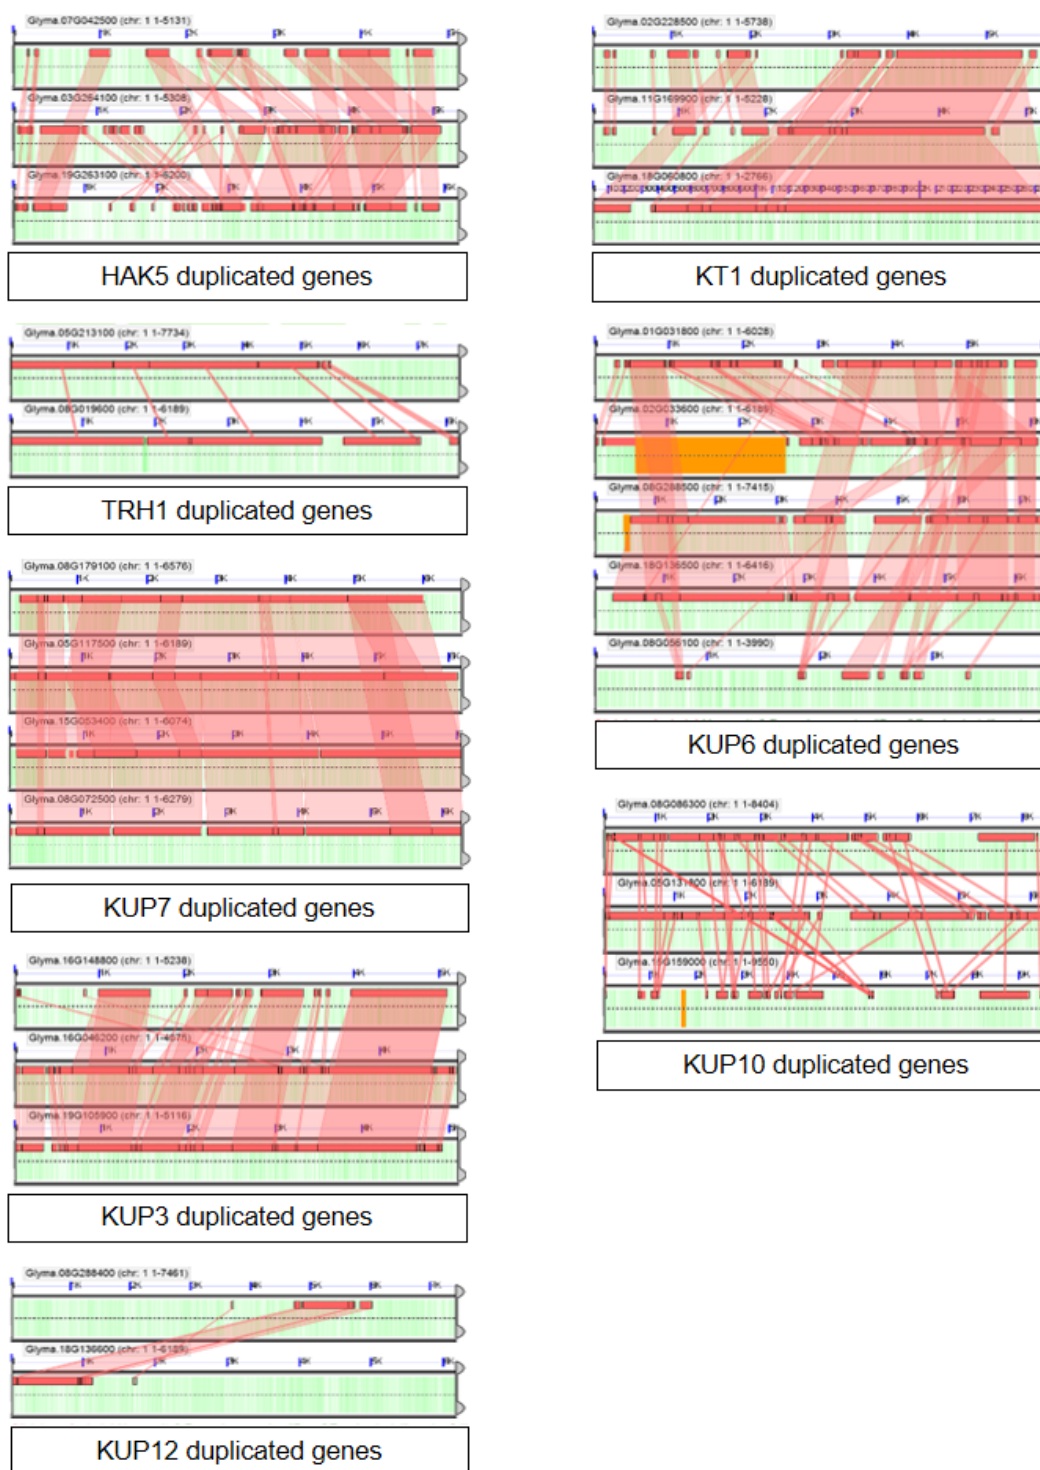

Continue...

## Voltage gated K<sup>+</sup> channel

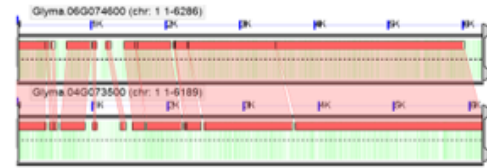

**K<sub>silent</sub> type duplicated genes**

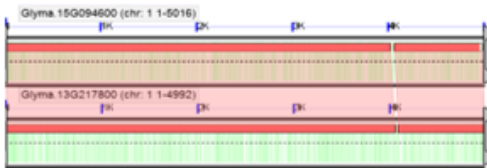

**K<sub>in</sub> (KAT1) type duplicated genes**

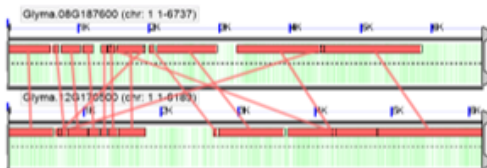

**K<sub>weak</sub> type duplicated genes**

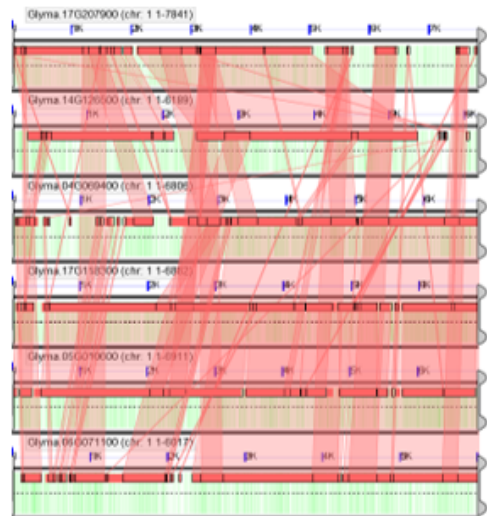

**K<sub>in</sub> (AKT1) type duplicated genes**

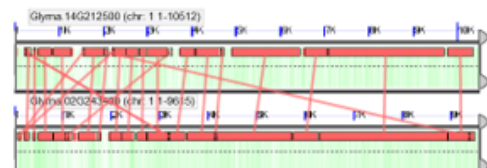

**K<sub>out</sub> type duplicated genes**

## TPK/KCO channel family

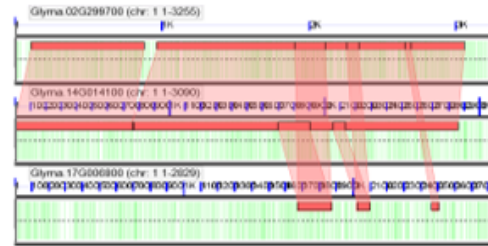

**KCO1 type duplicated genes**

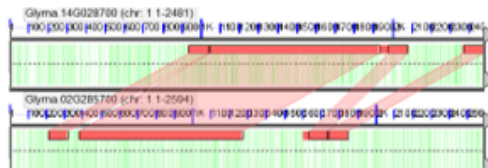

**KCO2 type duplicated genes**

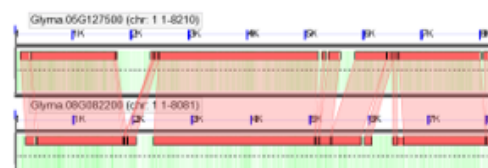

**KCO3 type duplicated genes**

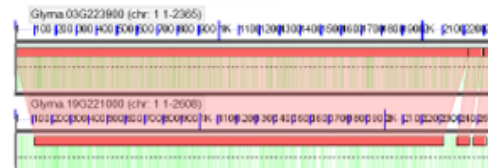

**KCO3 type duplicated genes**

Continue...

## HKT family

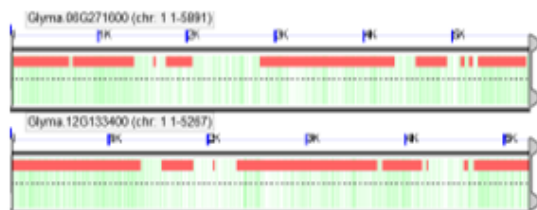

HKT1;1 type duplicated genes

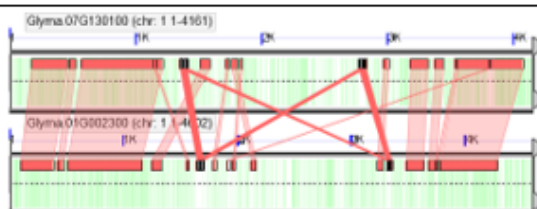

HKT1;3 type duplicated genes

## KEA family

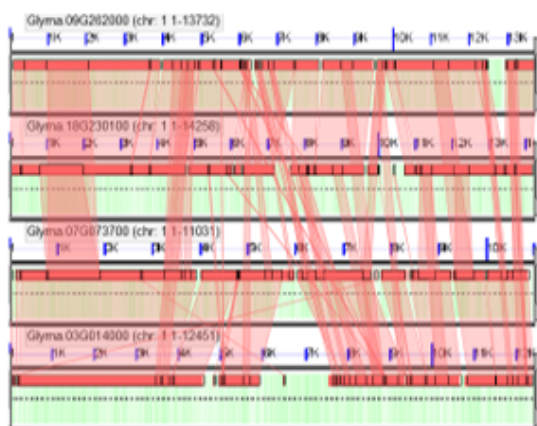

KEA1 and KEA2 duplicated genes

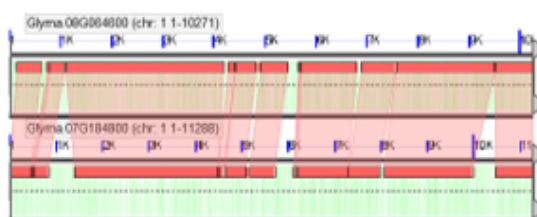

KEA3 duplicated genes

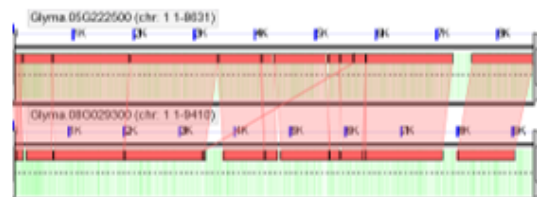

KEA4 duplicated genes

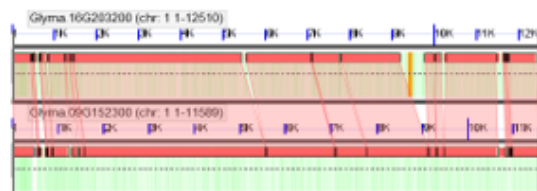

KEA5 duplicated genes

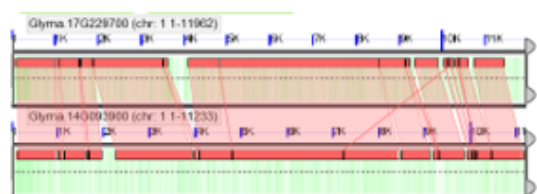

KEA6 duplicated genes

Continue...

**Supplementary Figure 3.** Paralog and syntenic analysis of all duplicated gene pairs in five K<sup>+</sup> transporter families. Green indicates GC contents in the duplicated gene pairs. Pink indicates the conserved regions during whole genome duplication events in each family.

Supplementary Figure 4

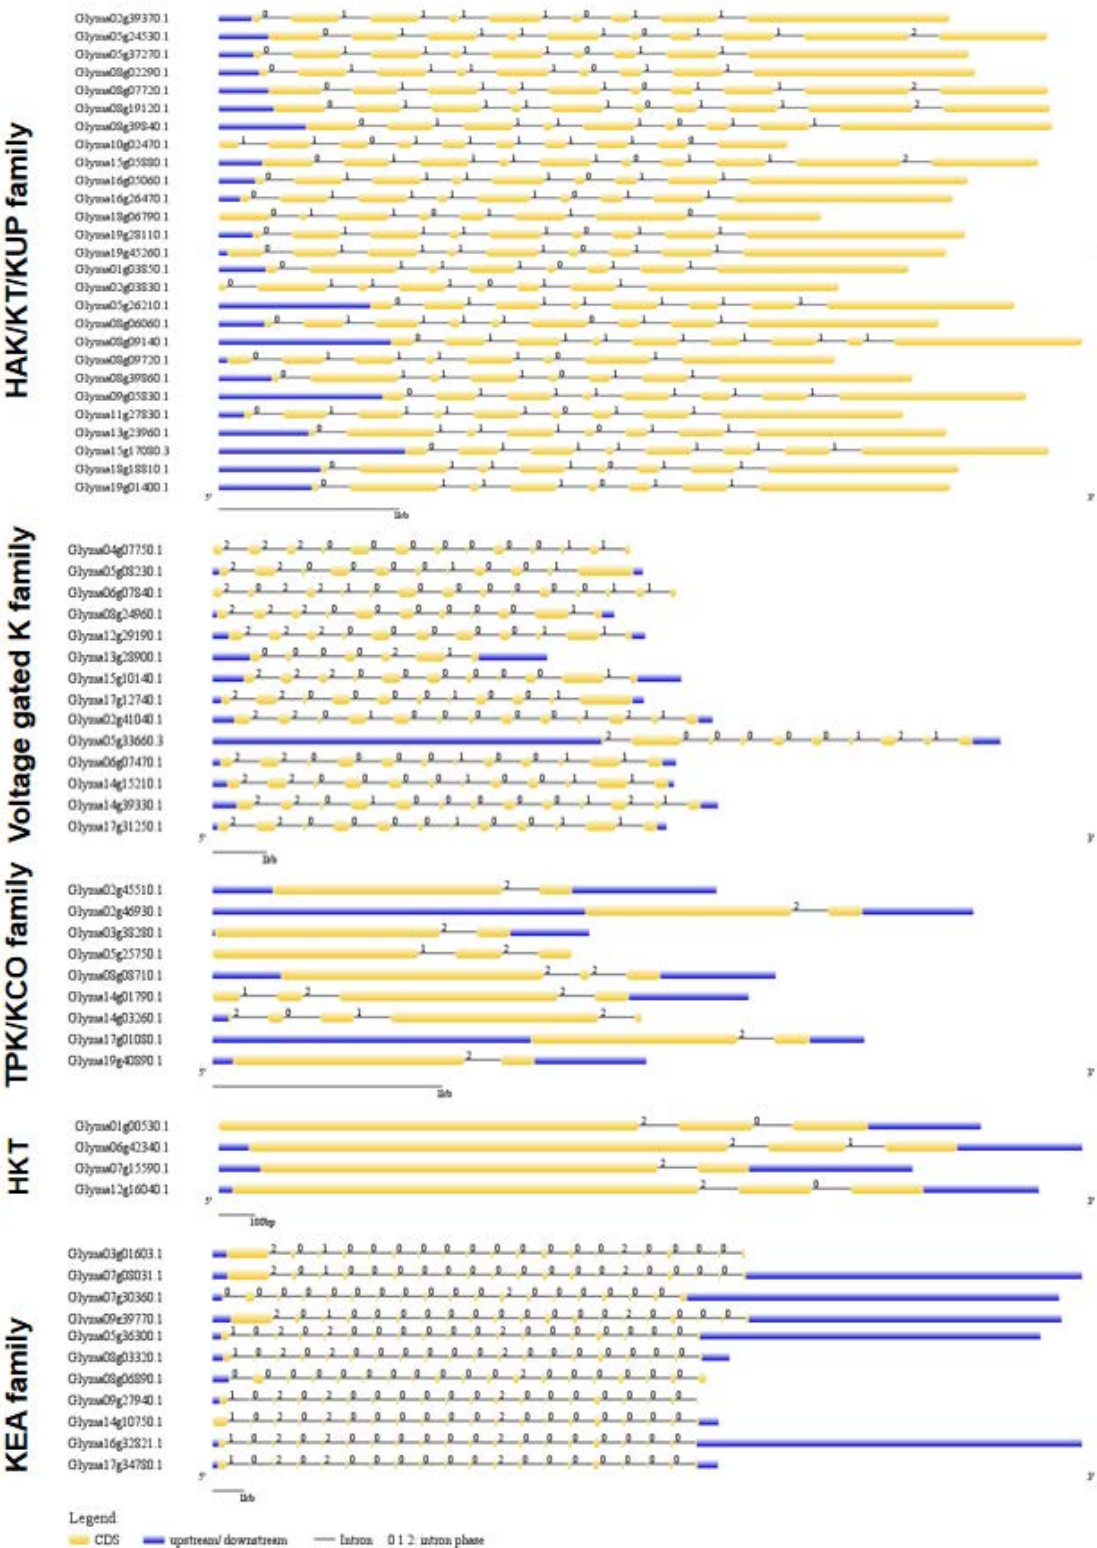

**Supplementary Figure 4.** Exon-intron structure of all 70  $K^+$  transporters in soybean. Untranslated regions are shown in blue and introns are shown as grey lines. Yellow indicates the coding sequences of genes. Intron phases are labeled as zero, one, and two.

**Supplementary Figure 5**

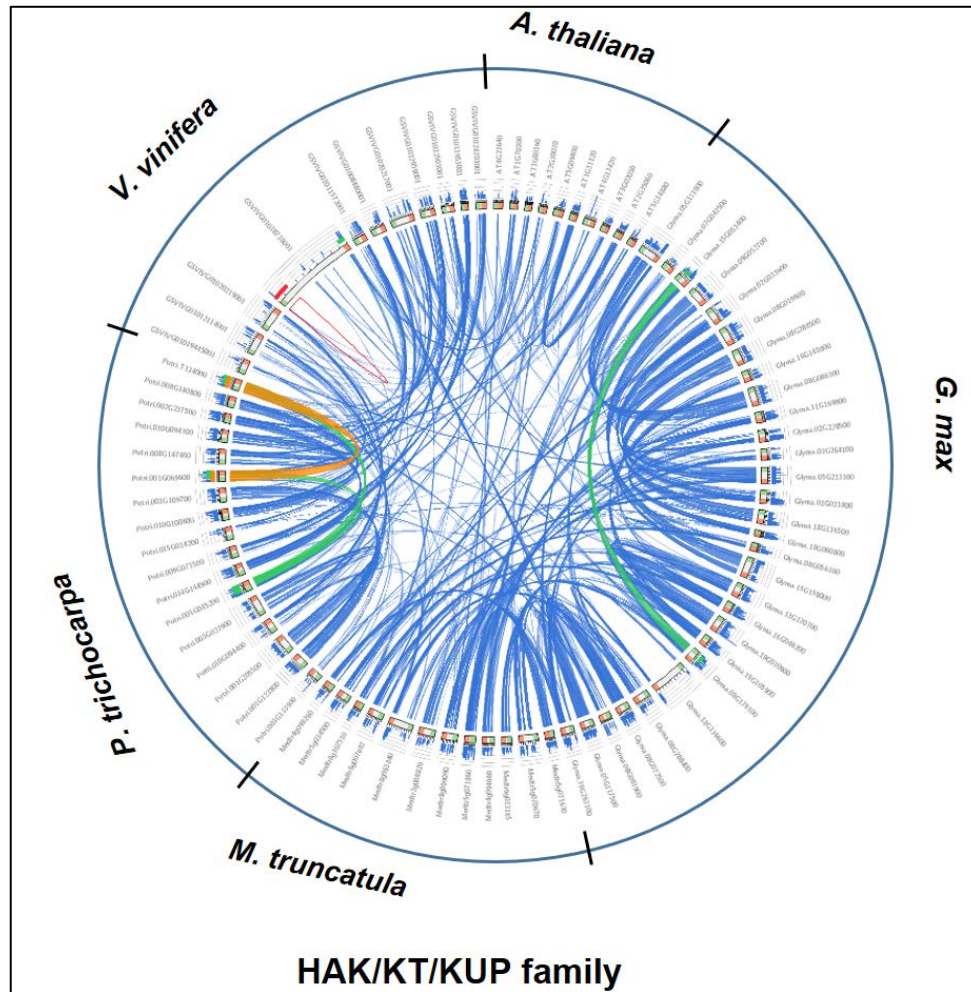

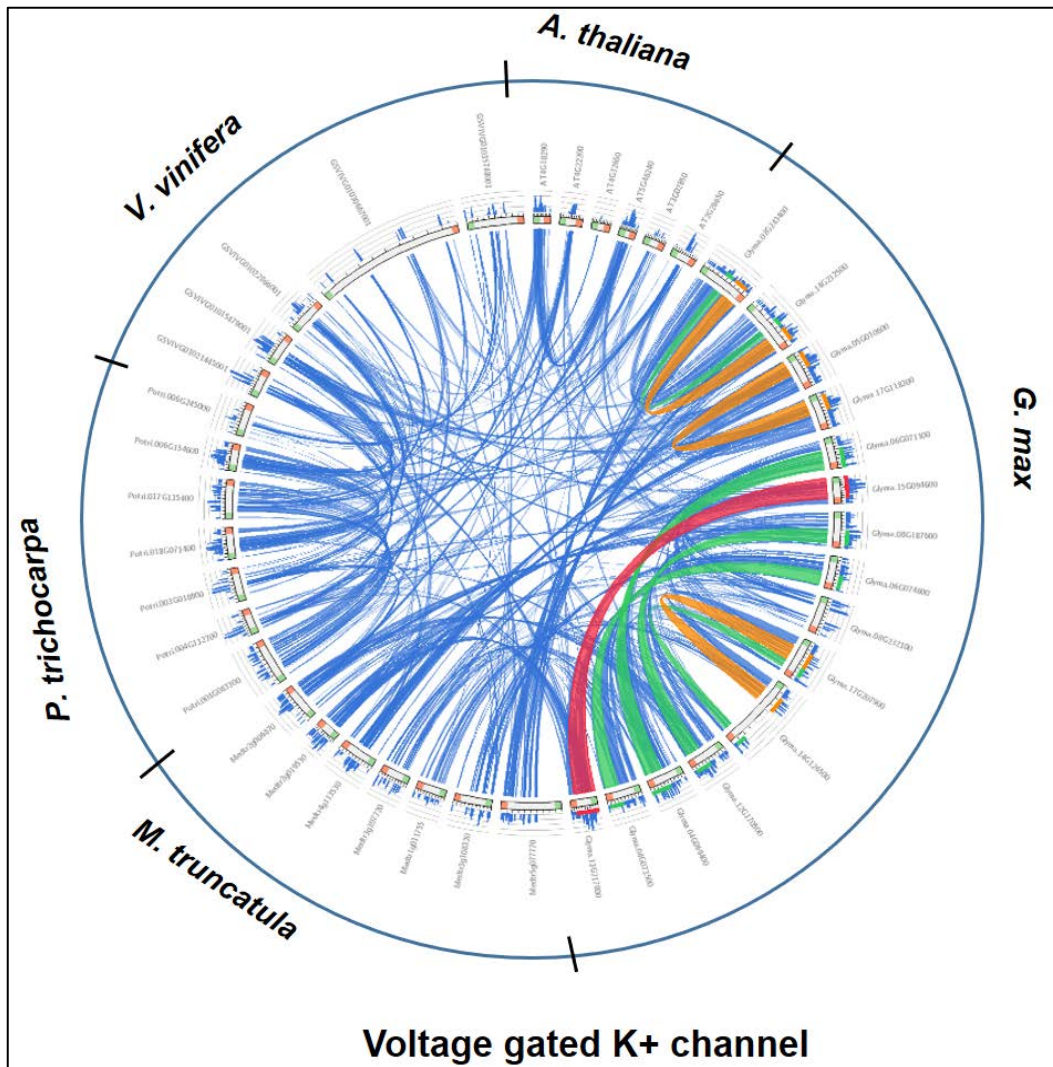

Continue...

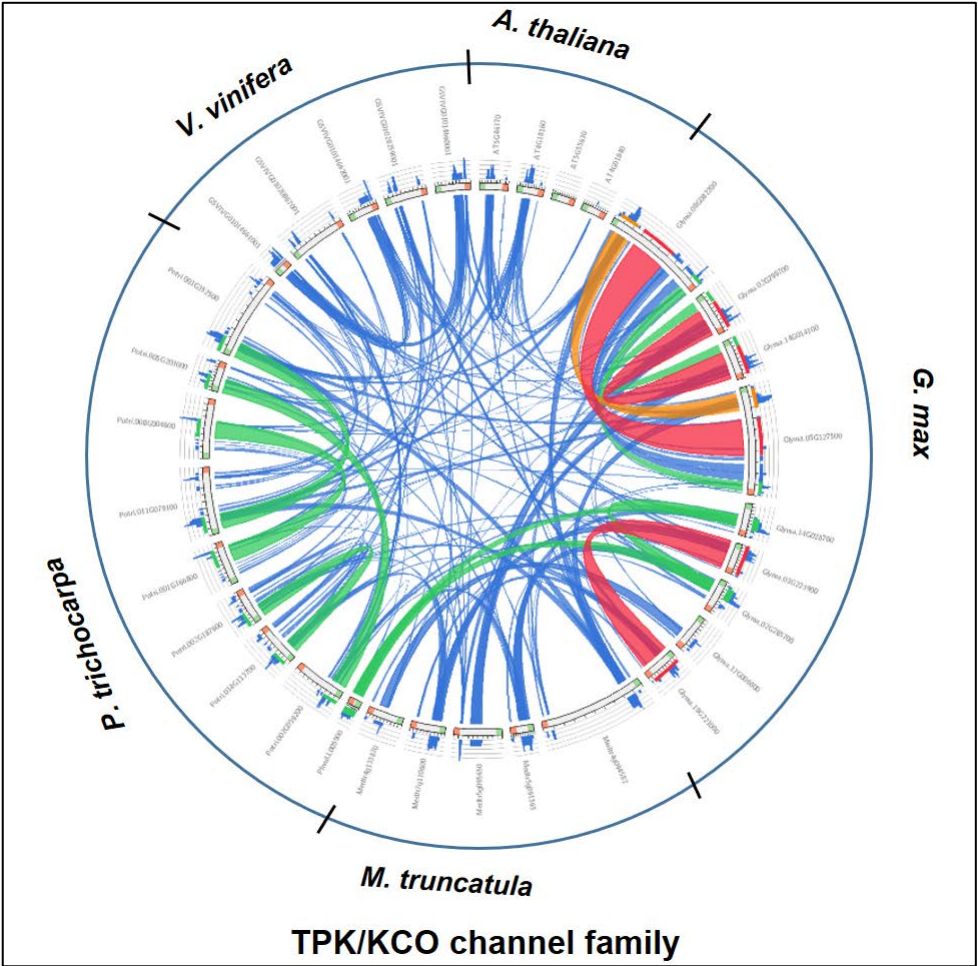

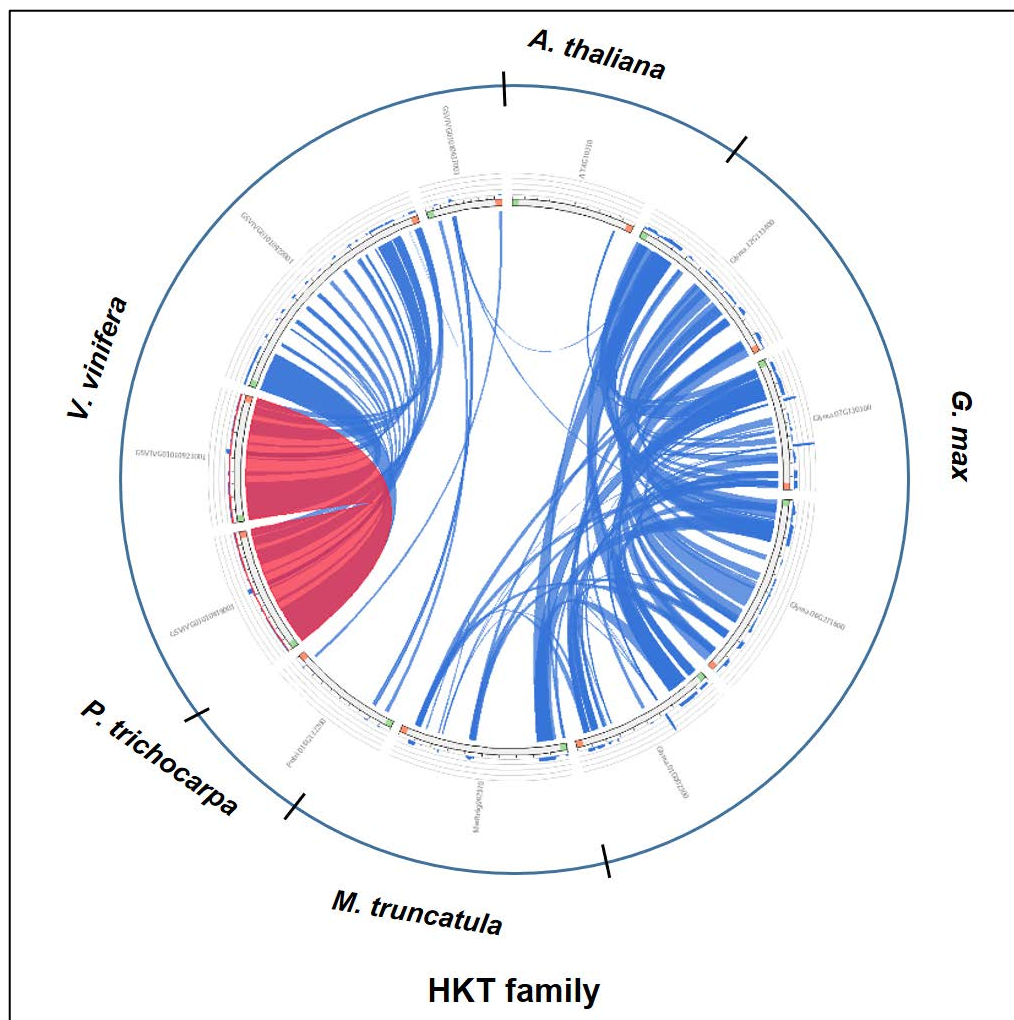

Continue...

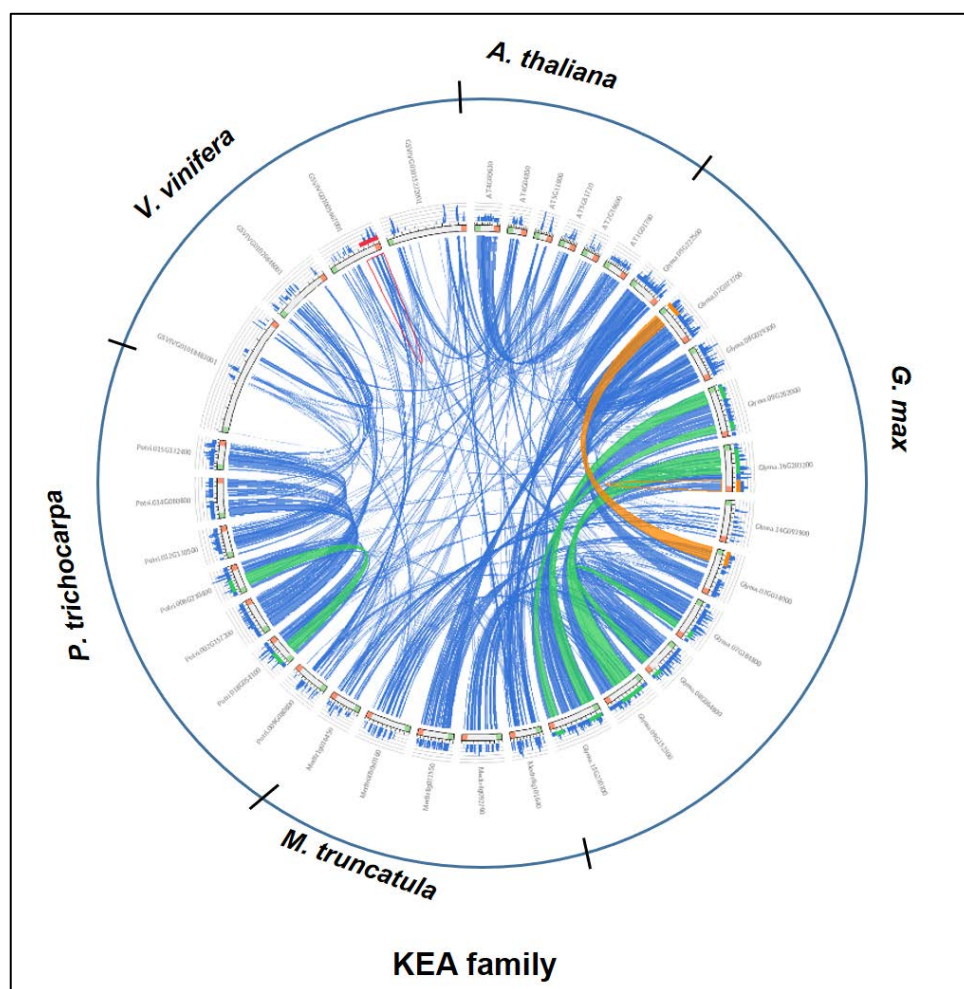

**Supplementary Figure 5.** Syntenic regions among all the orthologs of five different families identified in five dicots. Almost all annotated protein-coding genes are highly conserved.

Supplementary Figure 6

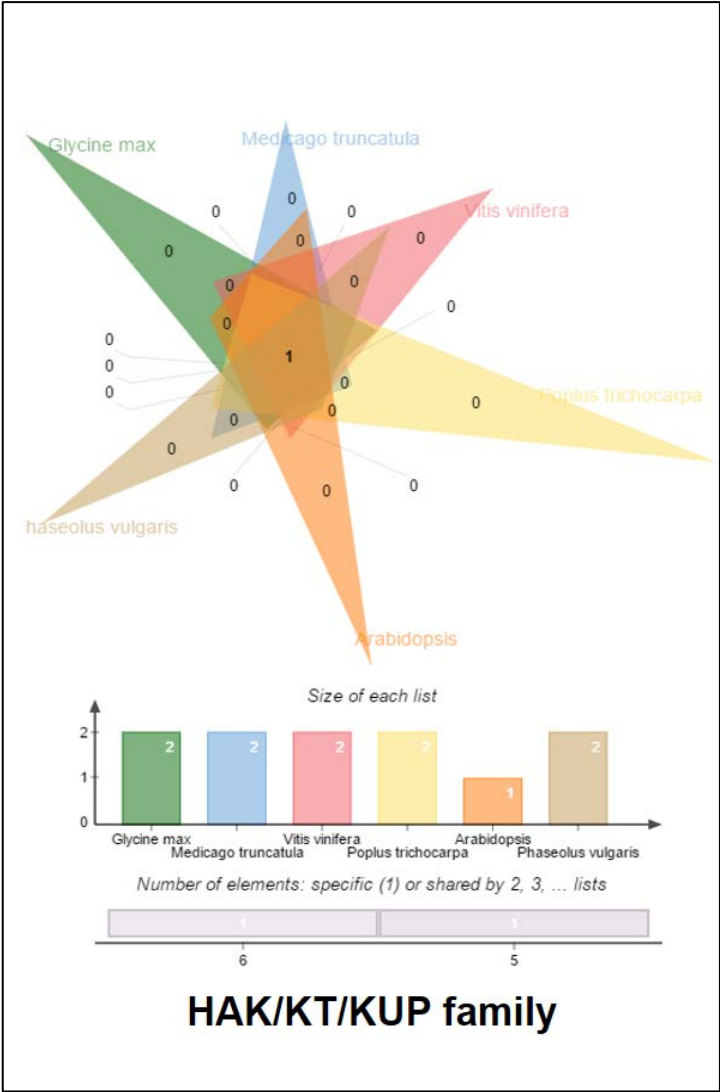

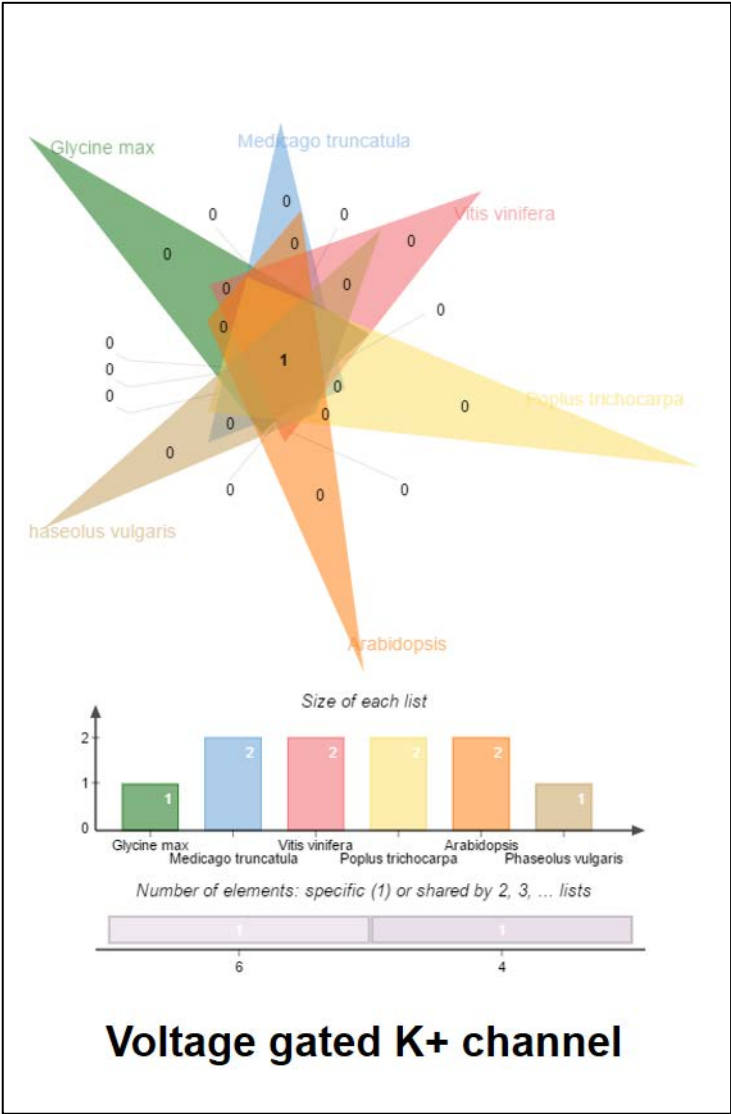

Continue...

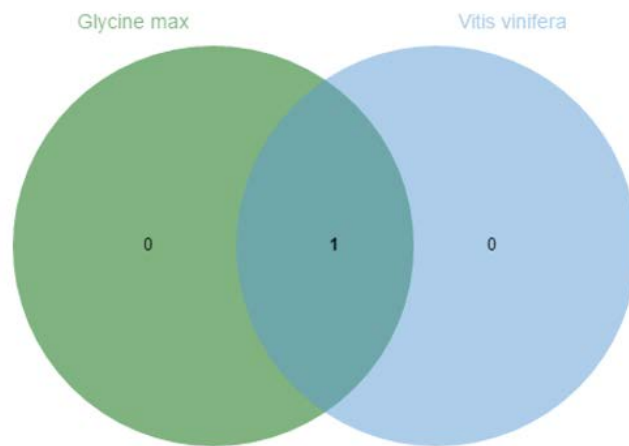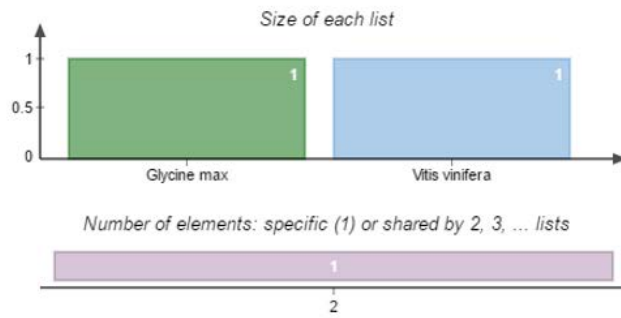

**HKT family**

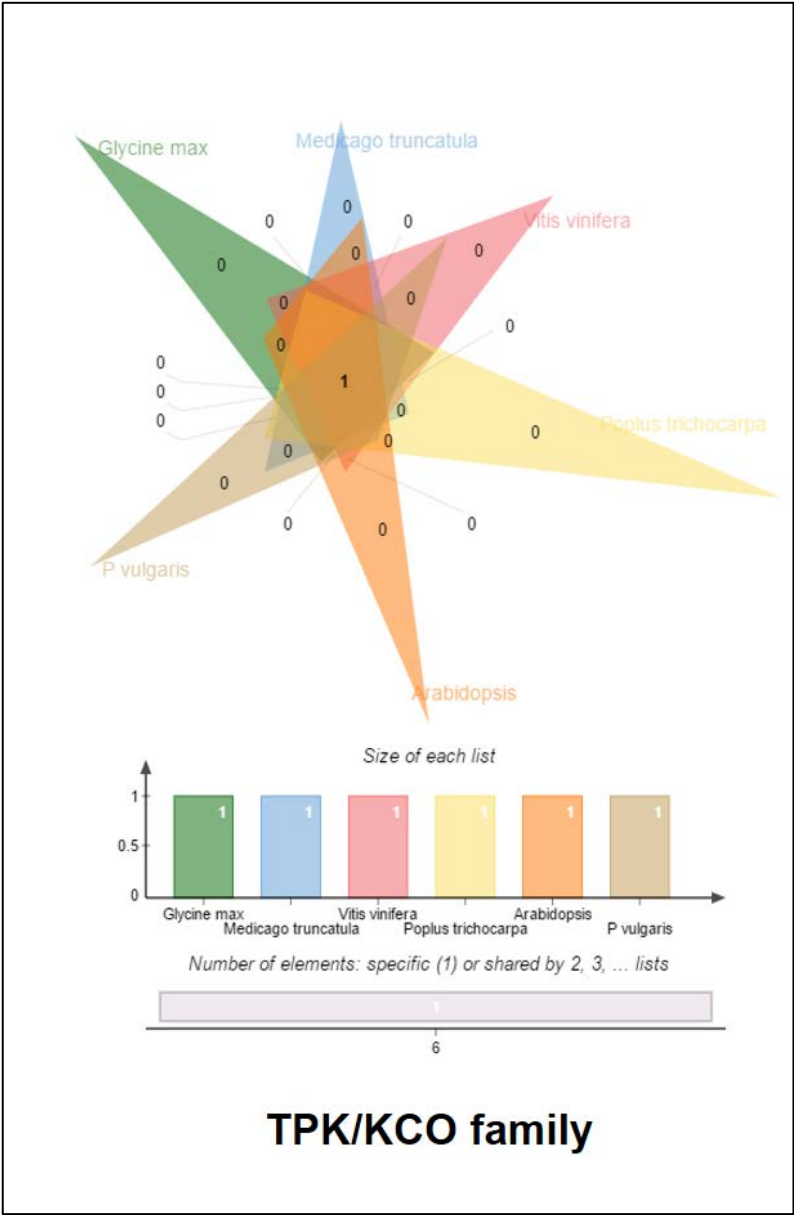

Continue...

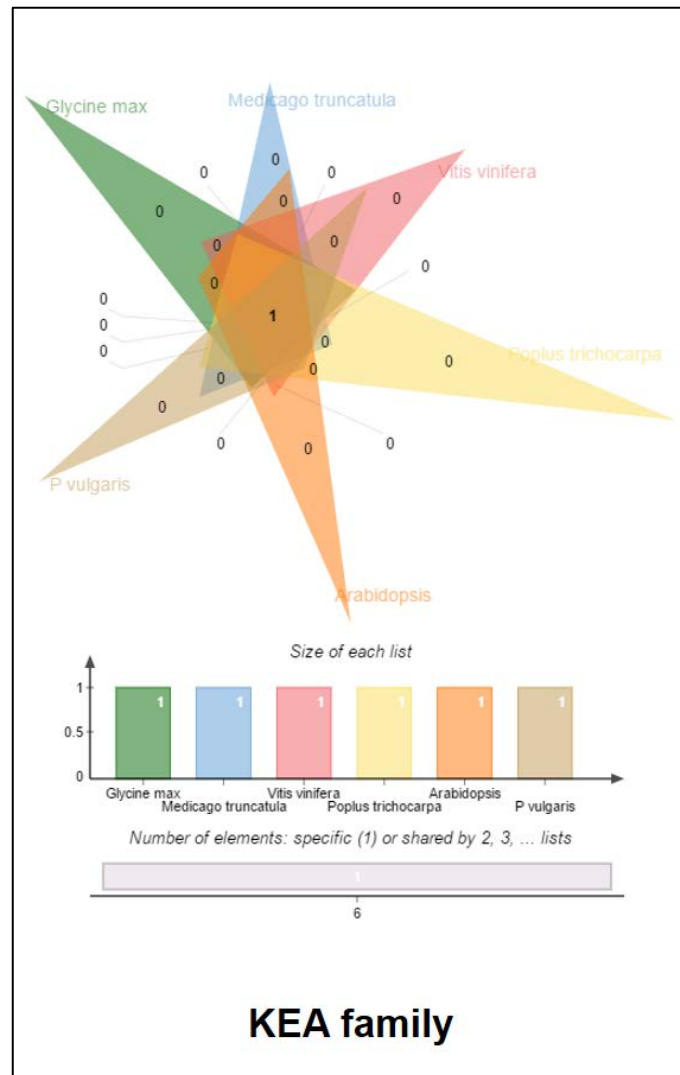

**Supplementary Figure 6.** Ortholog clustering of five  $K^+$  transporter gene families in five dicots. Number of clusters can be observed in the given figures.

Supplementary Figure 7

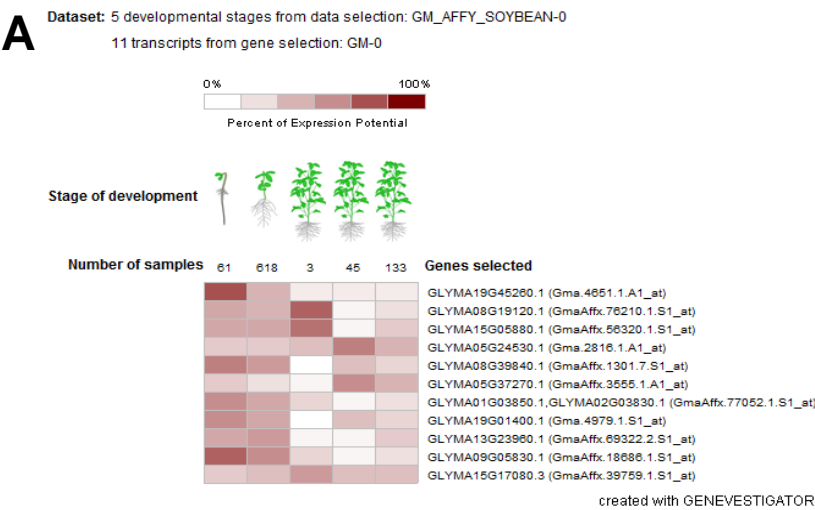



**B**

Dataset: 68 anatomical parts from data selection: GM\_AFFY\_SOYBEAN-0  
11 transcripts from gene selection: GM-0

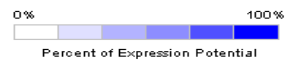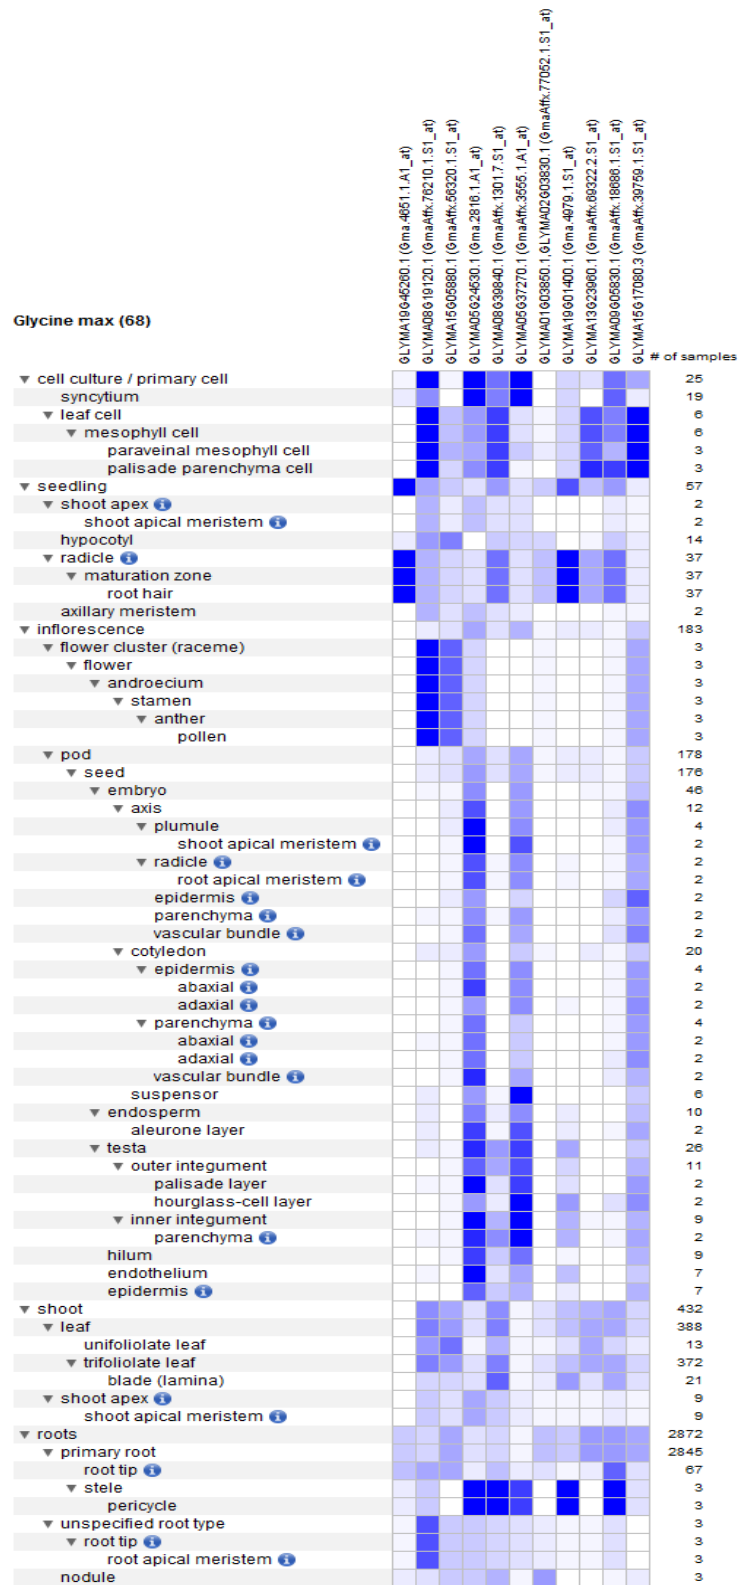

created with GENEVESTIGATOR

# C Detailed view of selected perturbations (absolute expression levels)

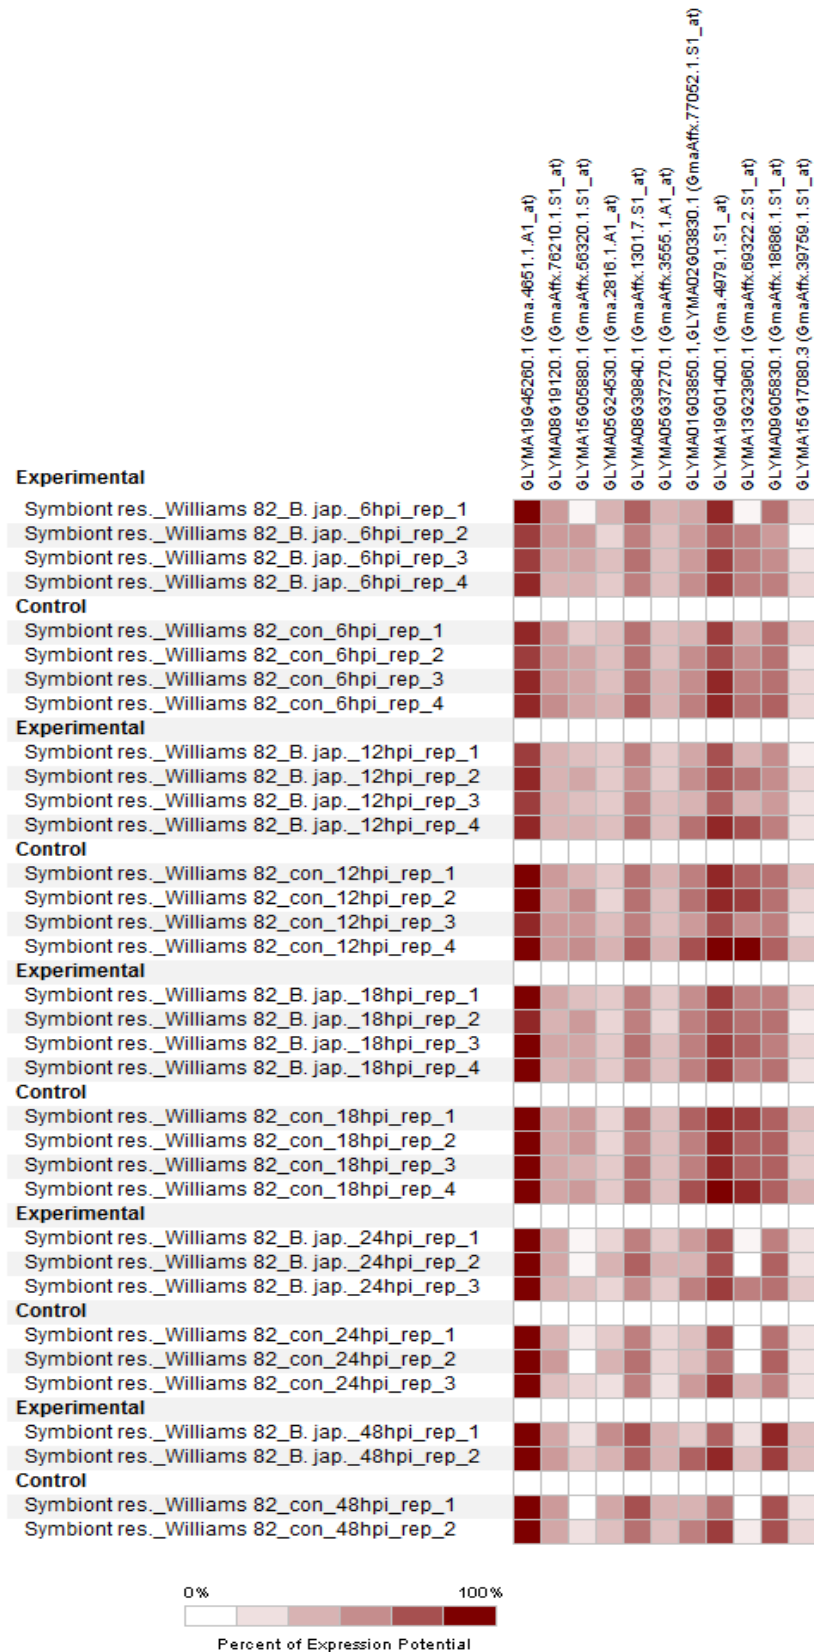

created with GENEVESTIGATOR

**Supplementary Figure 7.** Microarray analysis of HAK/KT/KUP family genes. **(A)** Genes expression across five developmental stages. **(B)** Genes expression in 68 anatomical parts. **(C)** Detailed view of genes expressed for *B. japonicum* inoculation to root hairs for nodulation in soybean.

Supplementary Figure 8

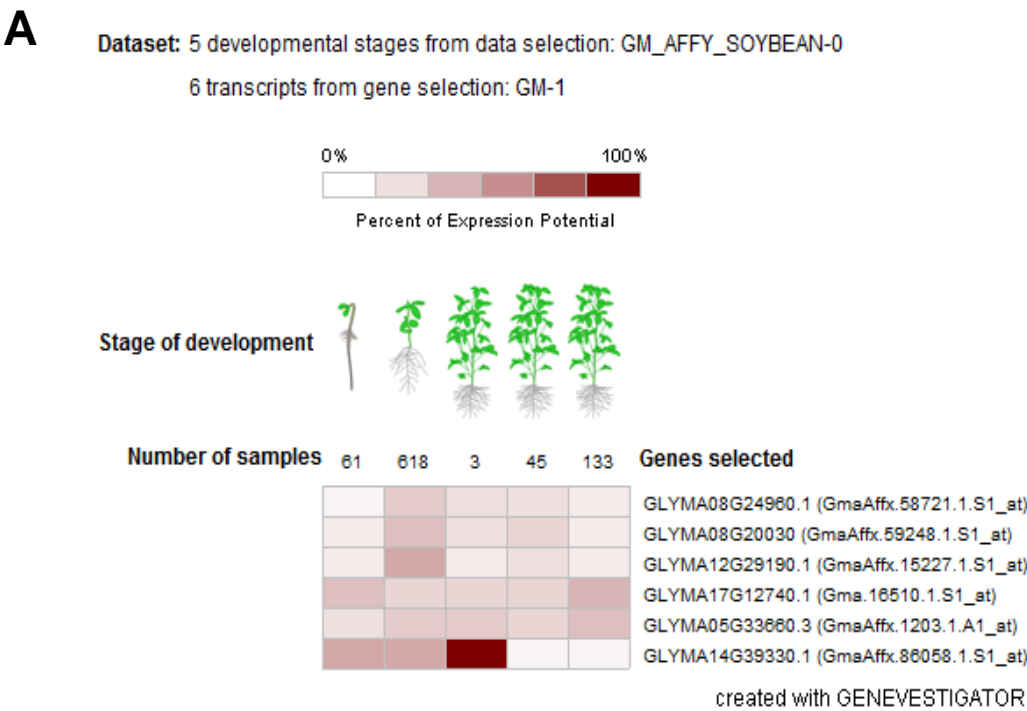

**B** Dataset: 68 anatomical parts from data selection: GM\_AFFY\_SOYBEAN-0  
6 transcripts from gene selection: GM-1

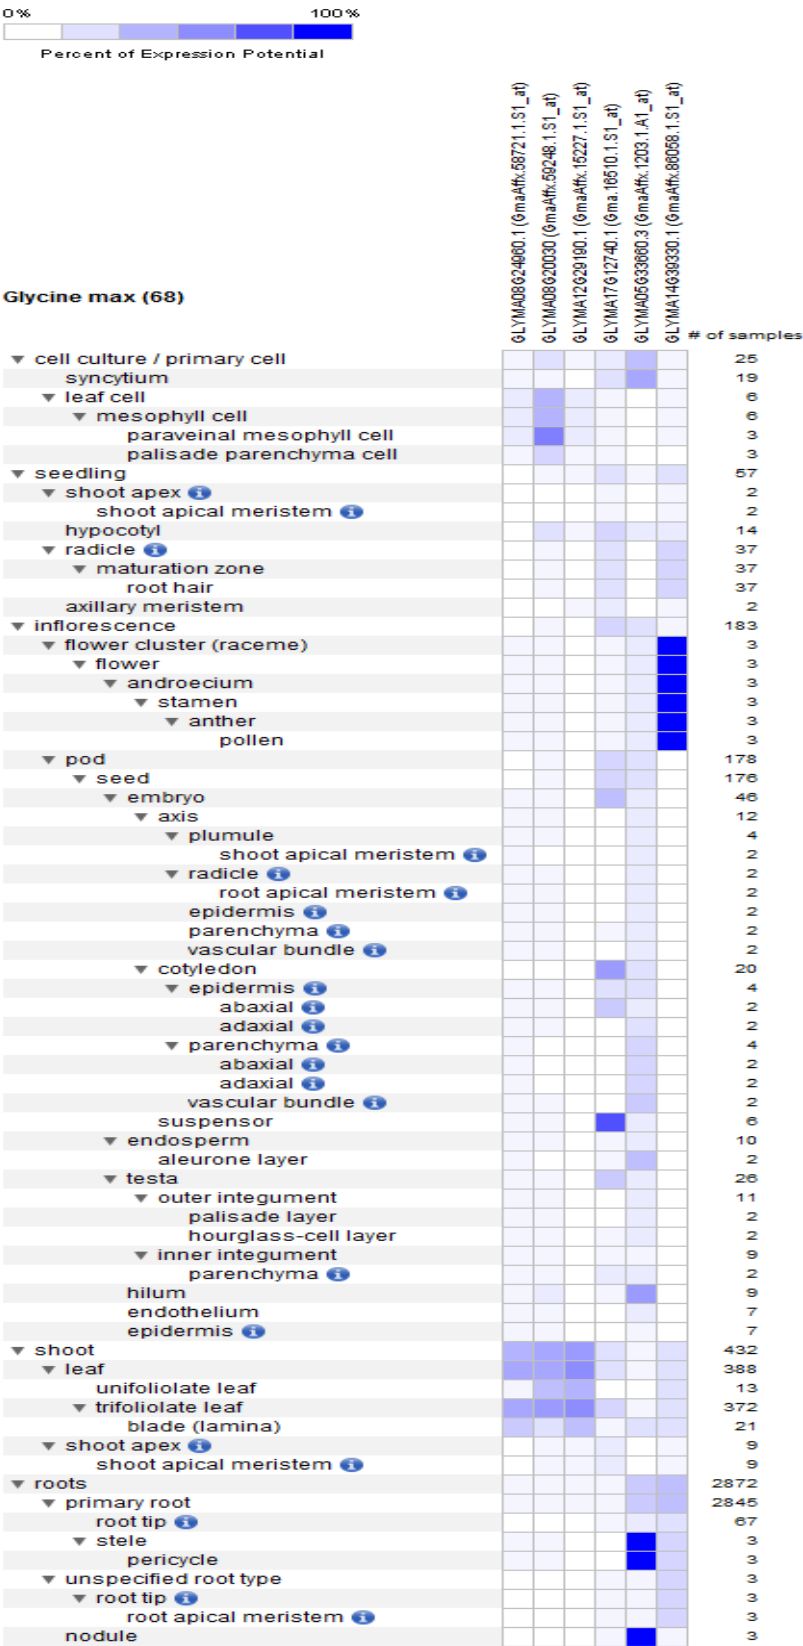

created with GENEVESTIGATOR

## C Detailed view of selected perturbations (absolute expression levels)

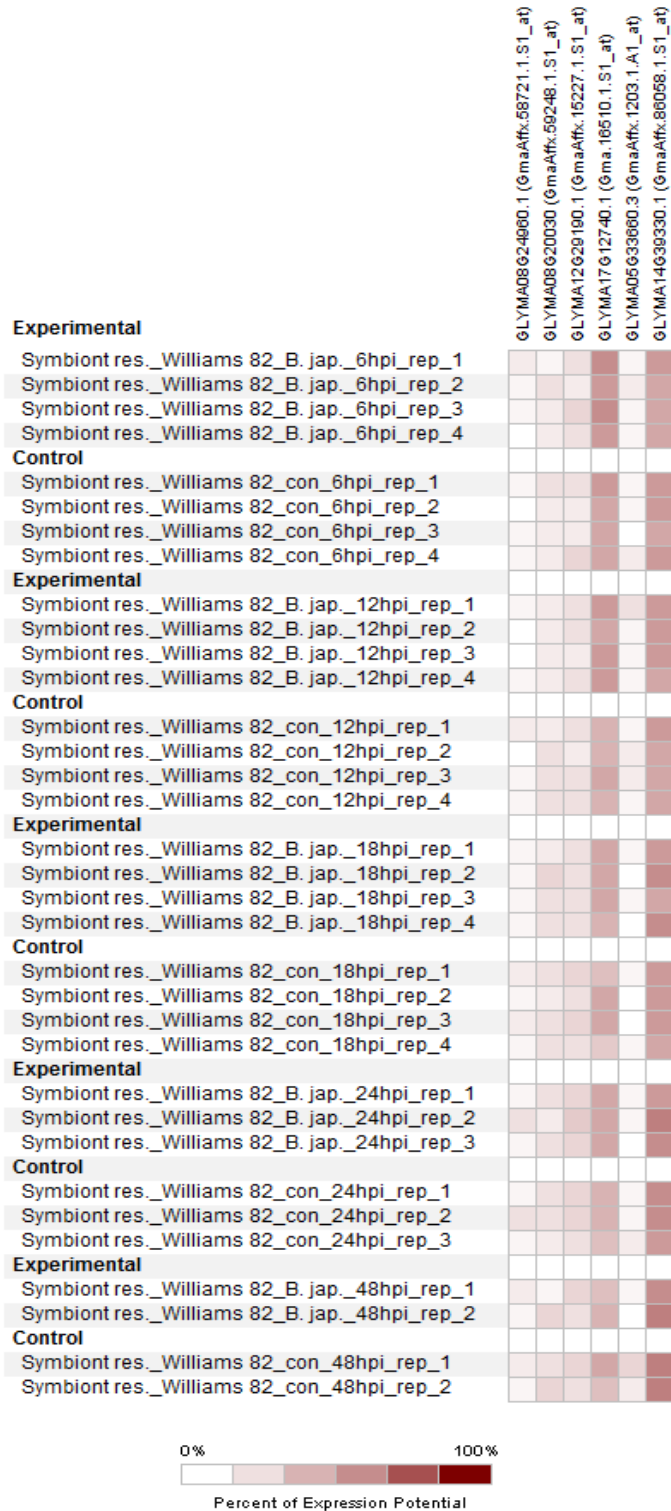

**Supplementary Figure 8.** Microarray analysis of Voltage gated K<sup>+</sup> channel family genes. **(A)** Genes expression across five developmental stages. **(B)** Genes expression in 68 anatomical parts. **(C)** Detailed view of genes expressed for *B. japonicum* inoculation to root hairs for nodulation in soybean.

Supplementary Figure 9.

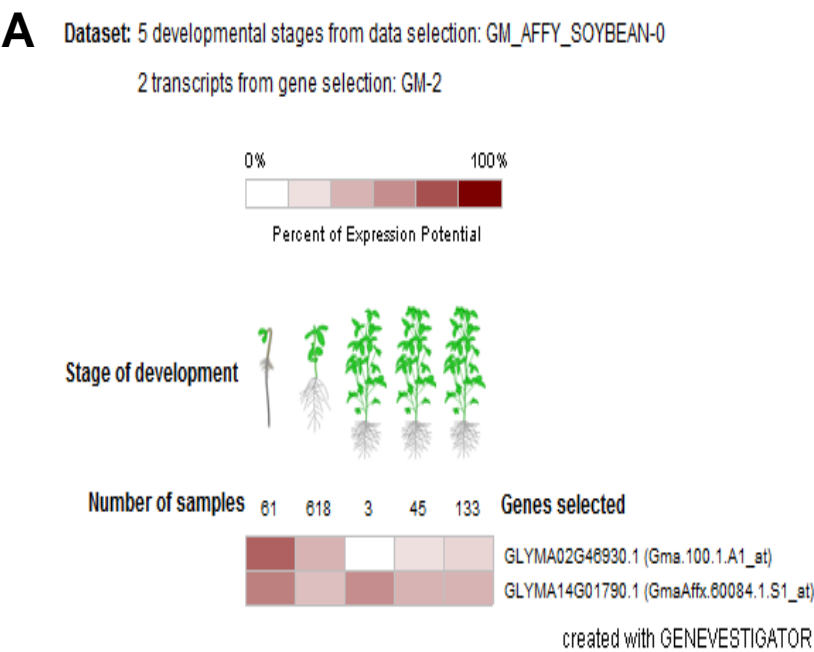



**B** Dataset: 68 anatomical parts from data selection: GM\_AFFY\_SOYBEAN-0  
2 transcripts from gene selection: GM-2

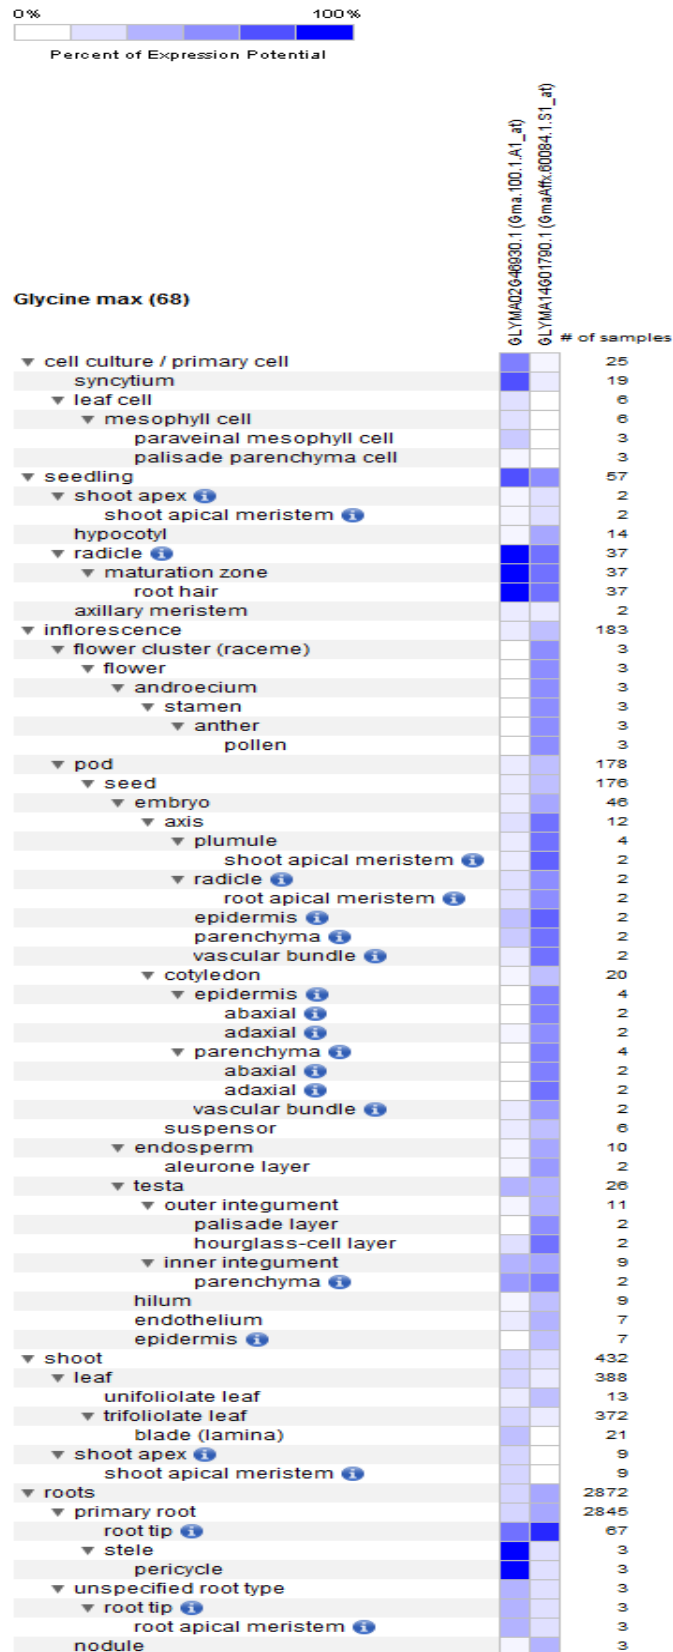

created with GENEVESTIGATOR

**C** Detailed view of selected perturbations (absolute expression levels)

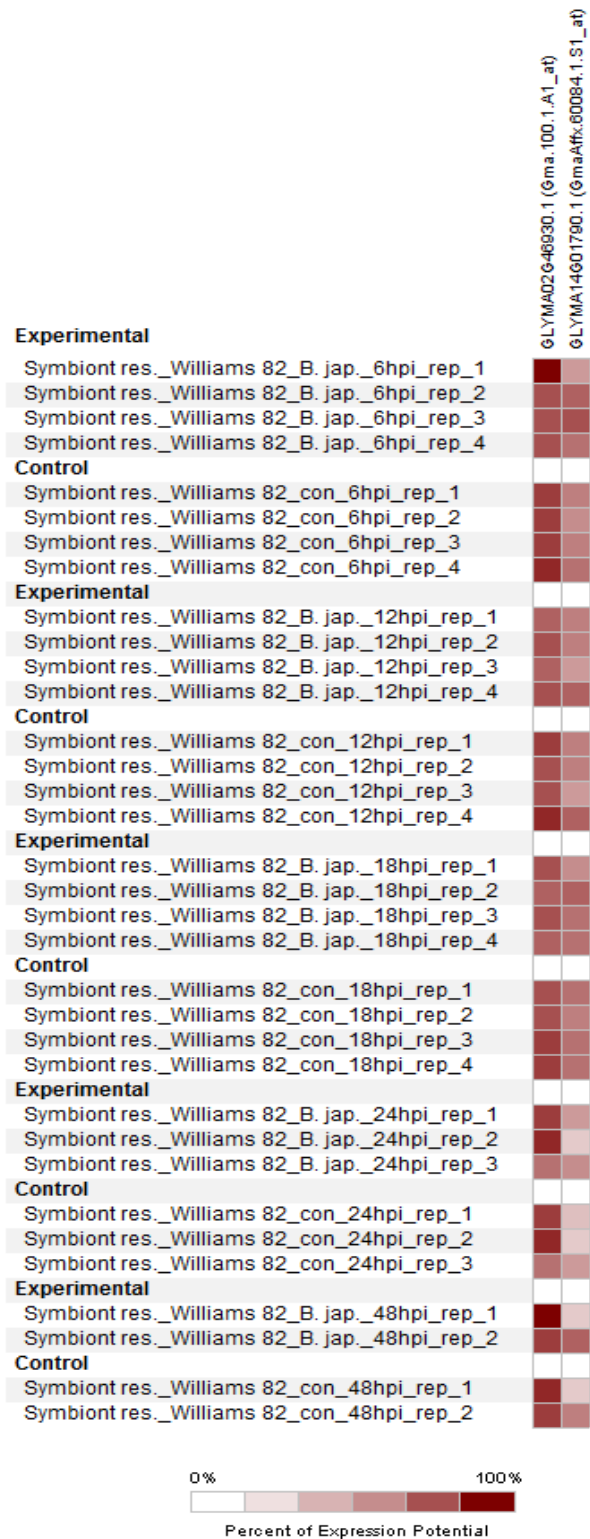

created with GENEVESTIGATOR

**Supplementary Figure 9.** Microarray analysis of TPK/KCO family genes. **(A)** Genes expression across five developmental stages. **(B)** Genes expression in 68 anatomical parts. **(C)** Detailed view of genes expressed for *B. japnicum* inoculation to root hairs for nodulation in soybean.

**Supplementary Figure 10.**

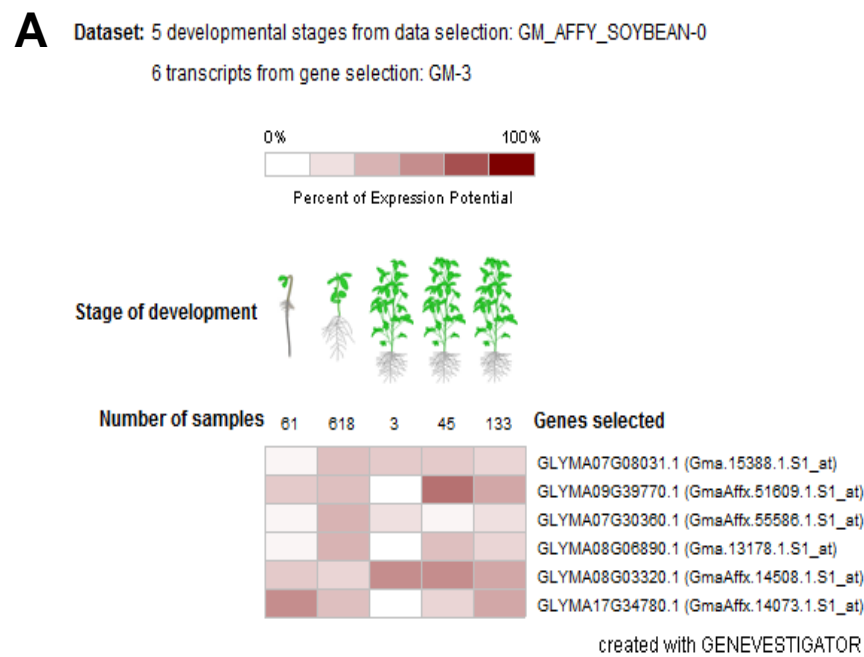

**B** Dataset: 68 anatomical parts from data selection: GM\_AFFY\_SOYBEAN-0  
6 transcripts from gene selection: GM-3

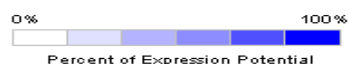

**Glycine max (68)**

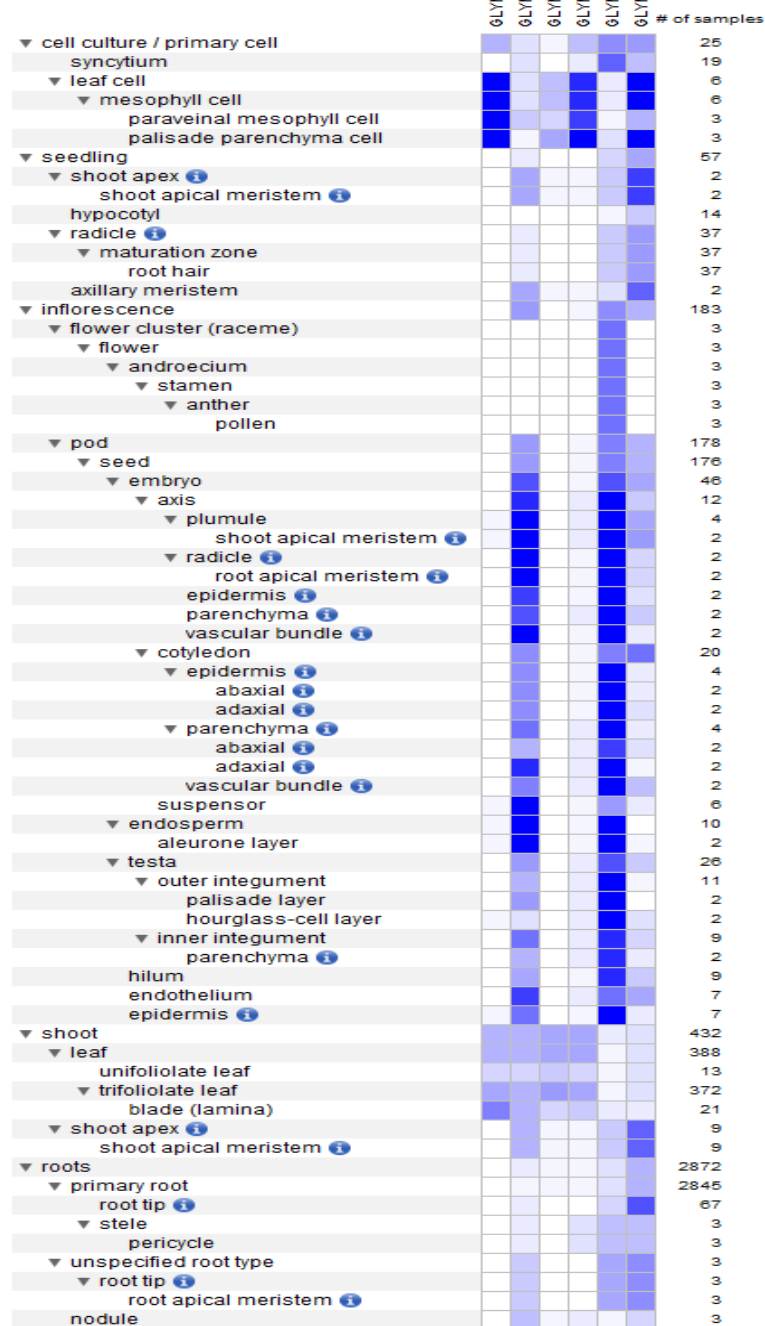

created with GENEVESTIGATOR

### C Detailed view of selected perturbations (absolute expression levels)

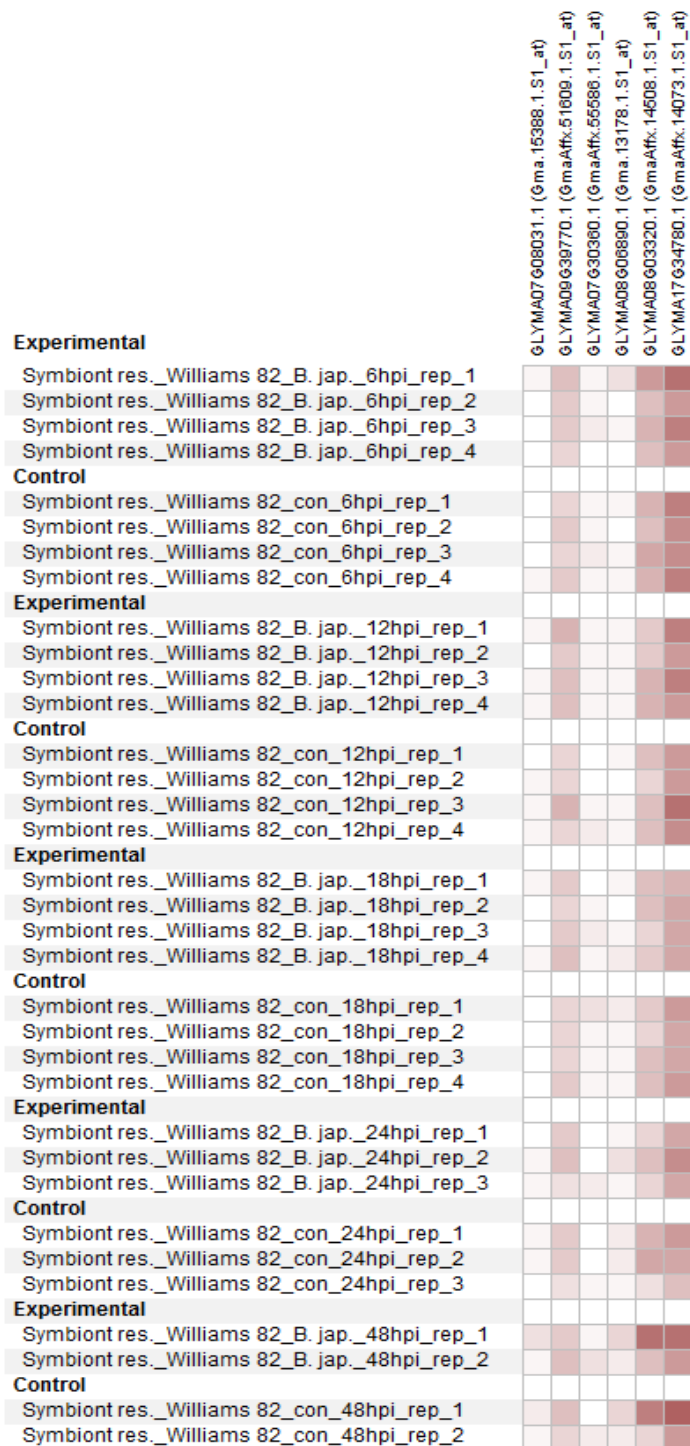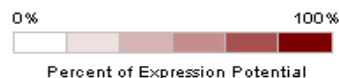

created with GENEVESTIGATOR

**Supplementary Figure 10.** Microarray analysis of KEA family genes. **(A)** Genes expression across five developmental stages. **(B)** Genes expression in 68 anatomical parts. **(C)** Detailed view of genes expressed for *B. japonicum* inoculation to root hairs for nodulation in soybean.
